# Supplementary material for: The cytochrome P450 (CYP) superfamily in cnidarians
Source: Sci Rep. 2021 May 10;11:9834. doi: 10.1038/s41598-021-88700-y (PMC8110760; doi:10.1038/s41598-021-88700-y)
Supplement: Supplementary file 1 — Supplementary Information 1. [file 41598_2021_88700_MOESM1_ESM.xlsx]

## Sheet: Table S1
The complement of ‘complete’ and ‘partial’ cytochrome P450 genes in H. vulgaris, A. digitifera, A. aurita, and N. vectensis. The number of cytochrome P450 genes identified in each CYP gene family are given; each tab in the spreadsheet is for a different species, as labelled. Gene counts include both complete and partial genes. Genes from N. vectensis were previously annotated but nomenclature is …

## Sheet: Hydra vulgaris
Hydra vulgaris
Complete CYPs
Name	Sequence	Contig	Region on Contig	Start Position	Length (amino acids)	Number of Exons
CYP4LA1	MVSVFYILFSGLVFYVVSKILWKLWRNSYGLSSIVTPPNVPFFGTSLYLHSDARKFFFQLYDYTRRYGDVFCIWLGPKPVICSSSVKFSEAVLSSQKVITKGFSYDFLHDWLKTGLLTSTGSKWKTRRRLLTPSFHFSILNNFIKIFEEQASILVDKLAVAADNKEVVDVQVPIGLATLDIICETSMGVKVNAQSHPDSEYVKAITVLNEEIQMRQKFPWLWFDAIYKLLPCGKRFYKALDVAHKLSFDVINERMQMKIQESYCETASDEKKFFLDLLLDIYRKGKIDTEGIQEEVDTFMFEGHDTTSAALGWTLWLLGKNPDVQKKLHKEIDEIELNGGSLYDKVRQSKYLEIILKESLRMHPPVPMYGRTVEEDMTIDGQFVPKGAQIVLLVLILHS…	Contig38533	140255-131156	140255	491	4
CYP4LA2	MIYTLCIIICGFYFLIKILWMCWKYSYGLTSIATPPNTPFLGTSFYFLSDSRKSYFQLCNYTKQFGNVFCIWLGPKPMIVSSSVKFLKAVLSSEKITTKGFSYDWIHDWLKTGLLTSSGPKWKARRKLLTSSFHFSVFNRLKIIIEEQACILVDKISFAADNKKVVDVQTLIGLATLDVICETIMGVKINAQSYPDSEYVKAISVLHKEIVNRMKFPWLWFDVIYKLLPCGKRFYKALDVAHKFTFDIINKRMEISVNESYIDTPLEEKSYFLDLLLNIHKKKEIDMEGIQEEVDTFIFAGHDTISVALSWTLWLLGKYSEIQRKLHKSIDEIELNGGSLFEKVRNFKYLENIIKESMRIHPPVPMYGRTVEENMTIDGQFVPKGAQIILLVLMLHSDP…	Contig38184	15709-12814	15709	502	4
CYP4LA3	MFEGHDTTSSALSWILWLLGRYPQVQQKLHSEIDEVELTGGSLYEKVRNFKYLENIIKESLRIHPPVPLIGRHIEKDMVIDGQFIPKKSEIGVLVMMMHSSPEYWKDPYDFIPERFEQEDFVKRNPYIYIPFSAGPRNCIGQKFAMIEEKMLLYSIMKNFYVQSMQNENEILPSLDLIRKSVNGIILKLTER	Contig34458	11745-12323	11745	497	2
CYP4LA4	MFLVYSLLVVIFSYFLIKISWKLWIYSYGLSTVPTPPTIPFFGNCLQLESDSVKFNKQIREWSKIYGNVFCVWIGLRPMIYSSSVNFSEAILSSQKVLKKASVYEFLYEWLQTGLLTSTGNKWKLRRRLLTPSFHFSILNNFLKIFEEQGACLVDKLRIYAKSGGNFDIQVPIGLATLDIICETSMGVKVNAQSHPDSEYAKAIGILSEEIPKRIKYPWLWPDIIYKHLACGKRYYKALDVAHKLSLDVIKERVKTLIQNKSEVTSNKNKKESGSEKKKFFLDLLLDMHKKGEIDTEGIQEEVDTFMFEGHDSTSSALSWMLWLLGRYPQVQQKLHSEIDEVELTGGSLYEKVRNFKYLENVVKESMRIHPPVPLIGRHIEEDMVIDGQFVPKSSEIVL…	Contig38513	28124-26628	28124	498	1
CYP4LA5	MFLTFMFLFLIYFLIKVFWKLWIYSYGLSTVSTPPTLPLFGNCLQIKSDPVKASKQLFEWSRVYGKVFCVWVGIRPTIFSSSVNFSEAILSSQKIIQKGFVYNFLHEWLKTGLLTSTGNKWKLRRRLLTPSFHFSILDNFLKIFEEQGNCLIDKFRVLAQNGKYFDIQVPIGLATLDIICETSMGVKINAQYQPDSEYVTAINILSEEIVRRFKYPWLWPNIFYKHFSCGKRYFKALDIAHKLSLNVIHERIQTSLQNESENVLINKLDNKSVLNNEEELGVGKKRFFLDLLLDMHKKGEIDVDGIQEEVDTFMFEGHDTTSSAMCWTLWLLGRYPQIQQKLHAEVDEVELTSGSLYEKVRNFKYLENVLKESLRLHPPVPLISRYIEEDMMIDGQFIP…	Contig34562	4110-5627	4110	505	1
CYP4LB1	MAFILLIFFLLLITLFLIWIYWVRSYNLNFVPSPLRFPLFGCALFLKSESHELFKQVRWFFSEFGSAFCLWIGPKPVLMTGNIDHIQTVLKSQKIITKSSSYTFLNEWLGTGLLTSTGAKWKSRRKVLTKAFHFSIINSYVDSFYQNSVSLSNHLENHSGVPINIQALMSLFTLDIICETAMGFKLNSMKNLNCDYVNAVEEVKILLIERQKSPWLWNKFVYKLFSSGKKFYTQLQVLKSFTKKIVNKRIKNYSLSSNGCKSFLDLLIDAYNQGKIDLEGIYEEVDTFMFAGHDTTAAALSYIFLMLGTHPKVQKKLHEEIDTNVNINSYENLSEKIRKMEYLDCVIKESLRLHPPVSVFGRILEDDTIFSNHLVGKGADIVLCPETLHTDPLYWENHR…	Contig39276	261614-263134	261614	506	1
CYP20N1	MEVMVMIGNCSSTQLLENHFSAGRGKISTQGPSQRNSRKELGNLGSLTFDGGIHKFLVENHKRLGPMFSFYWGKELAVSLACPILFKEVATLFNRPVNQFKLFLPLIGKECVQYANEDRGKKLRQINDRHFSHSSIKSYFKEFKQVGAELCSKWSSSENTRIPLNQNMLSIAFKTIVKTSFGPDYFKTNEEITEMQALKDFHLVSGQVYGLHDHPANGTCNPVQPCFAEMDKHLRGDYPEVNSKRENDFKAAVKKFKDKVRTMINHRRSQKIKSYTNFLDVMLEDDTVYTNDEQILDNVIVYMIGGYHTTGNLLTWLVYFLCKHPEVESKVYNEIKEFTEEDLDMELLTKFSYTKQVIDEVMRIAVLAPYAARYSDYDIIVDGHLIPKKTPIILALGTV…	Contig39320	289601-256594	289601	496	4
CYP3352A1	MFLEVIGALLIPPLIWIIWVYIKHLIDCLYYPRGPIPLPFIGNGYLIRKAEPYKELVNLGKIYGDVFSFSIGSVRFVIVNSLEGIQEVLVKKGWQFAGRPKGPSWDRSIHGLIQRDPSKKFKILRKLATSSLKIFADGLAGMESKAIEESFQLNKKLLETNGKPFSMQEITTLCVLNIICSILFNHRYKEDDLEFQDIIKYSNICFKERGVNNYIISIPWLRYFPSASSRNLDEMIKIRDPLLKKKVQEHKRSYDENNLRDLTDALIKASNSETGQDPDEKVTDDNIEFILNNFILAGSETSSNTILWFIVYILHWPEYQDKLYDEILKVTSGSRYPCLKDRPSLHLMQAAIYETLRLSSVAPFGLHHKAMEKSSICGKSIPKGALIITNLWSIHHDES…	Contig37979	47099-56117	47099	497	2
CYP3352A3	MFPEIVGAIMLPPLIWAAWIYIKHLVDCLVYPRGPFPLPFVGNAYLFSKGKPYKEFVKLGKTYGDVFGFSIGSIRYVVVNSLEGIQEVLIKKGSHFAGRPKIATFNRNTNSLINSDPGPRFKILRKLASSSLKIYAEGLLGMERIAISEYCELSKKLQSIKEKPVSVHKIMEQSTLNIICTILFNHRYEDDNQEFQNIIKYSSLIVQTFNETSYVSSIPLLRYFPTATSRNIFEIIRLRDPILKRKLQEHRKSYDKNNLRDITDALIKVSLDSEMGEELTEKITDDNIEFLLNDFMIAGSETSSSTILWFIVYMLHWPEYQNKLYDEITKVASDNRYVSLKDRPMLHLMQAAIHETLRLSSVVPLGLVHKAMENSSICGKFVPKGALILTNLWSMHHDE…	Contig38578	35249-41653	35249	493	3
CYP3352A4	MILKVIGSIFFPPLIWFVYSYIKHLIECLYYPKGPVPLPFIGNTNLLRKKETCKEFVNLGKIYGDIFGFSIGSIRYVIVNNLEGIHEVLIKKGSQFSGRPRIIYWSRTMNSLINNDLNATFKVLRKITSSSLKIYAEGLVGMEKRAIEEYTHLNKKLLSLKGQAVSIKNMIELTTLNIICTILFNQRYEQDDDEFQNIIKYSNLSFKAFSASNLLSSIPWLRYFPTTASKYIQEIERLRDPILKRKLQEHRKSYDENNLRDITDALIKASIHLNAEKDSLIKVTDDNIQFILNDLILAGSETSSSTITWFIVYMLHYPEYQDKIFNEVIKVTSGNRYPCLNDRPLLHLLQATIHETLRLSSVAPLGLRHKAMENSTICDKPVLKGTLIITNLWSIHHDE…	Contig38427	26767 -12273	26767	493	3
CYP3352B1	MFSEILVGCITPILLYIIGTYVKHLFKCQKLPPGPFPLPVIGNLHLLVKDPQRGLERISKRYGDIFSISFGMERFVVVCDLDSIKEVLIEKGTMFAGRPKSYVAEISTRNYQNVALGDYSPIWILMHKIMKSSMRVFEDEKEALEKIVEKESEELNKRILKSNYVESKINDKFVTGVMNVLCGIVFGTQYEENDKELEKVISFKQLILDGVADTFAISFLPWLRFFPSNGLKKVRKGVLIRDKLLRFQLKKHRETYNPNQIRDYTDYVLKYSKEFETSRNIDEQLSEDNMEMMLQDIFISGSETTISTLLWFAVYLVNWPKYQDDIYDETIKIVGNDRYPSLSDRPKLHLFESAMKETLRLSSVIPLGLPHRSLEETSIKNFKIPKNTNLMINLWQLHH…	Contig35787	73761-72775	73761	505	2
CYP3352C1	MFLEIAFGVTAPLLLYVIATYLDHLFKCRFYPPGPFPLPIIGNLHLIGKKPHEKFVEYSKKYGEVFSLSFGMHRVVIVSGKDSIREVLVQKSNIFAGRPKNYIANIVSRGYKNIGYGDIGPKWKILRKIAHSSLKNYGESTKHLETLVVKESEELHKRLFKNCNRSTELEDEFGVAVLNVICFIVFAKRYENKDSEFKKILMYMNYVFSGVASTNFASFIPWLRFFPLDGLRKLKKGLSIRDPVLRKQLLYHRETYNESNLRDYTDYVIQFSRDEAILKKFGEQLTDDYLELLLNDIFIAGTETALTTLLWSIIYLIHWPKFQDEIYNEIVSTIGKDRYPSMKDRNMLPLVNAALSETLRLSSVTPLGVPHKAMEDTTLLNDLKIPKGTTILTNLWQLH…	Contig37979	103694-107469	103694	506	2
CYP3352C2	MFLEVAFGVVTPLFLYVIATYLDHLFKCRFYPPGPFPLPIIGNLHLIGKKPHEKFVEYSKKYGEVFSLSFGMHRVVIVSGKDSIREVLVQKSNIFAGRPKNYIANIVSRGYKNIGYGDIGPKWKILRKIAHSSLKNYGESTAHLETLVVRESEELHKNLYKKSNRSTKLEHKFGVAVLNVICSIVFGKRYEYENCEFKEILTYMNYVFTGVAGTNAISFIPWLRFLPLDGLRKLKKGLSIRDPVLRKQLLYHRETYNESNLRDYTDYVIQFSRDEAILKKFGEQLTDDYLELLLNDIFIAGTETALTTLLWSTIYLIHWPKFQDEIYNEIVSAIGKNRYPSMKDRNMLPLVNAALSETLRLSSVTPLGVPHKAMEDTTLLNDLKIPKGTTILTNLWQLH…	Contig37979	85285-91393	85285	518	2
CYP3352D1	MWLEIFCGIVSPILLYIMVSYITHLLECRKYPVGPFPLPVIGNLLSLGLQPHETLAVYSKKYGNIFSISFGMKRVVIISEINATREALVQKATIFAGRPLSYAVQLATRGYKVITFMDYGPLWKNLRKVVHSSLTFYGVKSESFENLLLKESEDLHRRLLQKSKKPTELKTEFGAAITNVINFIVFGKKYQYSDPVFKEILTMTNQLFAGVSNTASIDFLPWLRYLPFTKIKEFKITLSKYFLFLNKELKTHKETFDENNIRDYVDSIIKFSKDKTTKSKFEEDLNNEHLEHIIGDMFLGGVETTLTSLLWLTLYMIHYQEIQQEIFNEIIAVVGENRYPSLKDQDSLNLVKASINESLRLASIVPLGVPHKTMSETTLMGYSIPKNTTVIINHWQIHN…	Contig36955	13274-11358	13274	506	2
CYP3352D2	MLFQIVCGLIAPVVLYIIGSYCVHLLECKKYPPGPIPLPVMGNLHLLGAEPHKTLALYSKKYGNVFSISFGMHRMVIISDIAATREALVQKATIYAGRSKSYVAQLVTRGYKDIAFMDYGPLWKVLRKVGHSSLKIYGEGYGRFEKLLTKESKELHKRILDKSNSPMELKTEFGVAVLNVICFIVFGERYQYSDPAFIEILTTINNIVSGLSNTTAVDFLPGLRYLQFSEIKKLKSSLVIYFRLLNDQLKKHKKTFDENNIRDFTDSIIKFSKDETMENKFEEELTDEHLEHVIGDMFIAGSETTLTSLLWLIIYMIHYPKYQEEIFEEITRVIGENRYPQLSDRDSLHLVKASIKECLRLSSIIPLGVPHKTMSDTTLIGYNIPKNTTVIINHWQIHN…	Contig36618	5383-10486	5383	507	2
CYP3352D3	MHLLECRKYPLGPFPIPIFGNLHLLGAEPHKILAAYSKKYGAVFSISLGLQRVVIISDITTAREALVQKASVFAGRPKSYLIKLISSGYKGIAFMDYGSFWKVLRKVGHSSLKIYGEGHERFEEILTKESEELHKRLLMKSKTSVDLKTEFGAAIINVICFIVFGERYQYSNSEFKEVLTTINNIVDGLSNTTAVGFLPWLRFLPFSPIKKMSISLSKYIRFLNDKLKKHKETFNENKIRDFTDSIINFSNNEAIKQKYKNVDEHLEPVIGDLFITGSETTLTSLLWLVLYMMHYPKYQQEIFKEITTVIGEDRYPCLNDRDSLHLVKASLKECLRLSSIVPLGLPHKTTRETVLMGHSIPENATVMINHWQIHNDTNYWENPNEFNPYRWIGKDKKFD…	Contig33277	33123-30042	33123	499	2
CYP3352D4	MHLLECRKYPLGPFPIPIFGNLHLLGTEPHKILAAYSKKYGAVFSISLGLQRIVIISDITTTREALVQKASIFAGRPKSYLIQLISSGYKGIAFMDYGSFWKVLRKVSHSSLKIYGEGHERFEKILTKESEELHKRLLKKSNNSVELKSEFGAAIINVICFIVFGERYQYSDSEFKEVLTTINDIVDGLSNTTAVGFLPWLRFLPFSPIKKLSISLSKYVRFLNDKLKKHKETFDEKKIRDFTDSIINFSNNEAVKQKFKNVDEHLEPVIGDLFITGSETTLTSLLWLILYMMHYPKYQQEIFKEITTVIGEDRYPCLNDRDSLHLVKAALKECLRLSSIVPLGLPHKTTKETVLMGHSIPGNATVMINHWQIHNDTNYWENPNEFNPYRWIGKDKKFD…	Contig37989	31432-27517	31432	475	2
CYP3353A1	MFLFVVFEVVFGLIIPVLLYVIVVYIYHIWECQRYPPGPFPLPVIGNYNLLANDPVKALCDLEIIYGDVFSLSLGTVRVVVVSSHESIYDVLVGDGSNFSGRPREYSSLLFTGGFENLSHMDNNPLTKKIRKVFYSKLKTNGSILAHNENIVKHESELLHQRLLQNEGSVTNLRYEIDLCIVNSICSIIFGNRLSDTCEVHEILKATRLLLKNLSNIEIMHYLPWMRFFLLKKQNEISESRNICKFWIQTQLHKRKKSLKNENISDILLNLWDQQKQENPNEEQYRMILVELVMAGSETTAATITWLIFYLLHWPHYQSILYKEIKNVCGDQYPTFNDIKSMPIMQATILETLRLSSVVPLSLSHKAVNNAKINKFTIPKDTIIITNLWGVHHNEKYWE…	Contig36266	53611-62974	53611	489	2
CYP3354A1	MLVFQQLIFAVLVPAFLYFVFSYLQHLWICSKYPKGLFPLPLLGNIHQLGKNSSQTFSSLTKIYGDIFSVSIGTQRLVILNSMESIHEALLTKGSTFGGRPTEFTSNVFTKGYKNLSHTDYGPNLKALRKVIHLSVQKYAGGLTRQEQMITFERDELCKKLFNTEKEIALRCEIDFCTVNVMSGYLFNERFLNQNSEFKDVVKSIQLLLDNSGITDKTTFIHWLRYLPLREWNEIKQARLVLNPWVEKKVEDHWRKYNENEIINVTDSMIQHFLTKYDGLDTDFAKKYITLLLIELLVAGTETTAITICWMVLYLIHNPEYQEEIYKEITLNIGCRYPTLAEKNLFPLLQAFIQETLRITSVVPLNLAHKALKDTSICGKIIPKDAIVITNLWNLHHDN…	Contig36486	34602-32938	34602	499	2
Partial CYPs
Name	Sequence	Contig	Region on Contig	Start Position	Length (amino acids)	Number of Exons
CYP3352A2	MLLQITCGFLFPPLIWIVWTYIKHLYDCLSYPQGPIPLPFIGNAHLLRKGEPYKELVNLGKIYGDVFGFSIGSIRYVVVNNLEGIKEVLIKKGSQFAGRPRLKLTISKALSRGMNGLIMSDPSPHFRILRKLASSSLKIYAEGLDGMEKKAINEYSYLHKKLSTMNGKAVSLKRMIEFSTLNIICTILFNHRYDENDQEFQDIIKYSNLSVRASSATSLISSIPWLRFFPSTASRNIYEIIRLRDPILKRKLQEHRSSYDENNLRDVTDSLIKVSLDSALENNSHEKITDDNIEFLLNDFIIAGSETSSNTVLWFIVYMLHWPEYQDKLYNEILKITSGNRYPCLSDRPMLHLMQAAIHETLRLSSVAPLGVGHKAMESSSICGKPVPKGAFILTNLWS…	Contig38647	109268-139879	109268	447	3
CYP3352A5	LFFLELSTLNIICTILFNHRYDENDQEFQDIIKYSNLSVKTFSGTSLISSIPWLRFFPTTASRNIYEIIRLRDPILKRKLQEHRSSYDENNLRDVTDSLIKVSLDSALENNSHEKITDDNIEFLLNDFILAGSETSSNTVLWFIVYMLHWPEYQDKLYNEILKITSGNRYPCLSDRPMLHLMQAAIHETLRLSSVAPLGVGHKAMESSSICGKPVPKGAFILTNLWSIHHDETHWNNAMSFYPERWLEKSGEFNLKLGEAYLPFSSGPRSCLGEALAKIELFIFISRLVKDYRFEKPTEEELPNLKGESGITRIPSEFKVMTIPRN	Contig31353	18752-17785	18752	326	2
CYP3352A6	ELGTLNIICTILFNHRYEEDDKEFQDIIKYSNLTVRVFSGTNILSSFPWLRFFPSATSRSIYEVIRIRDPILKKKLQEHKSSFDENNLRDVTDALIKVSLDLDIAKGSEEKITDENIEFLLNDFIIAGSETSSSTILWFIVYLLHWPEYQDKLYNEIIKVTSGKRYPCLNDRPLLQLMQATIHETLRLSSVGPLALVHKAMENSSICGKSVPKGAFILTNLWSIHHDESYWKNPMCFYPERWLEKSGEFNSKLGYAFLPFSGGPRSCLGEALARTELFVFFSRLVTDYRFEKPNGEELPRLNGRLGLTCSPFDFKTVVVPRC	Contig38689	20681-21648	20681	322	2
CYP3352A7	FKELGTLNIICTILFNHRYEEDDKEFQDIIKYSNLTVKIFGGTSILSSIPWLRFLPSASSRNIYEIERIRDPLLKKKLQEHKSSFDENNLRDVTDVLIKVSLGSDIAKGSEEKITDENIEFLLNDFIIAGSETSSSTILWFIVYLLHWPEYQDKLYNEIIKVTSATIHETLRLSSVGPLAIVHKAMENSSICGKPVPKGAFILTNLWSTHHDESYWKNPMCFYPERWLEKSGEFNSKLGYAFLPFSGGPRSCLGEALARTELFVFFSRLVTDYRFEKPNGEELPRLNGRFGLTCSPFDFKSVVVPRC	Contig38689	51161-52124	51161	308	2
CYP3352D5	MLFQIVCGLITPVLLYIIGSYCVHLLECKKYPPGPFPIPIMGNLHSLGAEPHKTLALYSKKYGNVFSISFGMHRMVIISDIAATREALVQKATIFAGRSKSYVTQLVTRGYKDIAFMDYGPLWKVLRKVGHSSLKIYGEGYGRFEKLLTKESKELHKRILDKSNSPMELKTEFGVAILNVICFIVFGERYQYSDPAFIEILTTINNIVAGLSNTTAVDFLPGLRYLQFSEIKKLKSSLVIYFRLLNDQLKKHKETFDENNIRDFTDSIIKFSKDETMENKFEEELTDEHLEHVIGDMFIGGSETTLTSLLWLIIYMIHYPKYQEEIFEEITRVIGENRYPKLSDRDSLHLVKASIKECLRLSSIIPLGVPHKTMSETTLIGYNIPKNTTVIINHWQIHN…	Contig37989	109469-113541	109469	444	3
Additional CYPs from this species
The genes listed below were not included in the phylogenetic tree
	Sequence	Transcript ID	Notes
CYP3431A4	MFLICLALLILSIGLFFLRYLLKRIFHPLQLLPSPKEQLITGHISHFQGRDHSNTFLGFNEKFKEEGLCTLDTLYVPRYVYLIAPEFIKKIFADGKLFQRATSLKVLAPIIGNSMLTSNYEDHHWQRKLFNGAFTSQQLKNYFPAFLTHTDFLMKLWSYTSDKESGTNLTVLDDLSNLSFDIIGDVGFGYQFNTITSHSRNEFTSAIRYLAEIQLNASVFLKVLISYFPFLIQLLVMFGKRRKFIQIVRKTLNKLIEKRKKEIDDGISTEEKDIITIVLKDQQQESSKLTNDLIRDNLLLFLVAGHETTSNAMTWCLYMLGTNLEVQDKLREEILKNILDVNNISFEEVMSLKYLDCVVKETLRLHGPAPILRRRTMNAIKFGEYEVPANTVLQTHISS…	GAOL01025944	Full length
Total number Genes	25
Full length Genes	20
Partial Genes	5
Revised sequences after phylogenetic analyses					Length (amino acids)	Note 1	Notes on updated gene
CYP3352A2	MLLQITCGFLFPPLIWIVWTYIKHLYDCLSYPQGPIPLPFIGNAHLLRKGEPYKELVNLGKIYGDVFGFSIGSIRYVVVNNLEGIKEVLIKKGSQFAGRPRLKLTISKALSRGMNGLIMSDPSPHFRILRKLASSSLKIYAEGLDGMEKKAINEYSYLHKKLSTMNGKAVSLKRMIEFSTLNIICTILFNHRYDENDQEFQDIIKYSNLSVRASSATSLISSIPWLRFFPSTASRNIYEIIRLRDPILKRKLQEHRSSYDENNLRDVTDSLIKVSLDSALENNSHEKITDDNIEFLLNDFIIAGSETSSNTVLWFIVYMLHWPEYQDKLYNEILKITSGNRYPCLSDRPMLHLMQAAIHETLRLSSVAPLGVGHKAMESSSICGKPVPKGAFILTNLWS…				498	Full length gene	C-term from Sc4wPfr_739.g28821.t1, note: the N-term of Sc4wPfr_739.g28821.t1 t is not correct, exons are: exon 1 810360- 810689, exon 2 807843-808045, exon 3 780081-781046
CYP3352A5	MLLQFSCGVLFPPLIWIVWTYIKHLYDCLSYPQGPIPLPFIGNAHLLRKGEPYKELVNLGKIYGDVFGFSIGSIRYVVVNNLEGIKEVLIKKGSQFAGRPRLKFTISKALTRAMNGLIISDPSPHFKILRKLASSSLKLYAEGLDGMEKKAINEYSYLHKKLSTMNGKAVSLKRMIELSTLNIICTILFNHRYDENDQEFQDIIKYSNLSVKTFSGTSLISSIPWLRFFPTTASRNIYEIIRLRDPILKRKLQEHRSSYDENNLRDVTDSLIKVSLDSALENNSHEKITDDNIEFLLNDFILAGSETSSNTVLWFIVYMLHWPEYQDKLYNEILKITSGNRYPCLSDRPMLHLMQAAIHETLRLSSVAPLGVGHKAMESSSICGKPVPKGAFILTNLWS…				498	Full length gene	added more at the N-term but not complete, missing exon 1, added exon 2 744539-744742 (-) strand Sc4wPfr_739, exon 3 is 721659-722627 (-) strand EST DN246006.2 matches this seq and includes the first exon, TSA seq GEVZ01008292.1 matches this assembly with 3 amino acid differences
CYP3352A6	MLFKVIGTILIPPLIWVVWIYIKHLVDCLSYPQGPFPLPFIGNAHLIRNRESYKVFSEFQKIYGSVFGFSIGSTRYVVVNNLEGVQEVLIKKGSQFAGRPRRATWSRALNGLVACDPSPHFKVLRKLASSSLKIYAEGLVGMEKKAADEYSHLNKKLQTMNGKPVSLQNMIELGTLNIICTILFNHRYEEDDKEFQDIIKYSNLTVRVFSGTNILSSFPWLRFFPSATSRSIYEVIRIRDPILKKKLQEHKSSFDENNLRDVTDALIKVSLDLDIAKGSEEKITDENIEFLLNDFIIAGSETSSSTILWFIVYLLHWPEYQDKLYNEIIKVTSGKRYPCLNDRPLLQLMQATIHETLRLSSVGPLALVHKAMENSSICGKSVPKGAFILTNLWSIHHDE…				493	Full length gene	added more at the N-term but not complete, missing exon 1, added exon 2 183448-183651 (-) strand Sc4wPfr_1514.2,9, exon 3 is 169811-170776 (-) strand, TSA seq GGKF01059912.1 Hydra vulgaris matches this seq and includes exon 1
CYP3352A7	AWSRALNGLVACDPSPHFKVLRKLASSSLKIYAEGLVGMEKKAADEYSHLNKKLQTMNGKPVSLQNMIELGTLNIICTILFNHRYEEDDKEFQDIIKYSNLTVKIFGGTSILSSIPWLRFLPSASSRNIYEIERIRDPLLKKKLQEHKSSFDENNLRDVTDVLIKVSLGSDIAKGSEEKITDENIEFLLNDFIIAGSETSSSTILWFIVYLLHWPEYQDKLYNEIIKVTSGKRYPCLNDRPXLHLTQATIHETLRLSSVGPLAIVHKAMENSSICGKPVPKGAFILTNLWSTHHDESYWKNPMCFYPERWLEKSGEFNSKLGYAFLPFSGGPRSCLGEALARTELFVFFSRLVTDYRFEKPNGEELPRLNGRFGLTCSPFDFKSVVVPRC				309	Partial gene	added more at the N-term but not complete, missing exon 1, added exon 2 142064-142267 (-) strand Sc4wPfr_1514.2,9, exon 3 is 139335-140296 (-) strand, frameshift between LDRP AND LHLT, possible pseudogene
CYP3352D5	MLFQIVCGLITPVLLYIIGSYCVHLLECKKYPPGPFPIPIMGNLHSLGAEPHKTLALYSKKYGNVFSISFGMHRMVIISDIAATREALVQKATIFAGRSKSYVTQLVTRGYKDIAFMDYGPLWKVLRKVGHSSLKIYGEGYGRFEKLLTKESKELHKRILDKSNSPMELKTEFGVAILNVICFIVFGERYQYSDPAFIEILTTINNIVAGLSNTTAVDFLPGLRYLQFSEIKKLKSSLVIYFRLLNDQLKKHKETFDENNIRDFTDSIIKFSKDETMENKFEEELTDEHLEHVIGDMFIGGSETTLTSLLWLIIYMIHYPKYQEEIFEEITRVIGENRYPKLSDRDSLHLVKASIKECLRLSSIIPLGVPHKTMSETTLIGYNIPKNTTVIINHWQIHN…				507	Full length gene	added C-term seq from Sc4wPfr_634.1 exon 1 256249- 256767, exon 2 259316-260318, frameshift near C-term in a run of four F , frameshift confimed in XM_012701614.1

## Sheet: Acropora digitifera
Acropora digitifera
Complete CYPs
Name	Sequence	Contig	Region on Contig	Start Position	Length (amino acids)	Number of Exons
CYP375B3	MLSSDERVSKSLSDIPGPISLPVIGTAWNVLRGASDERLEKRLLPLQVQDVKRYGPIHKQSIGGTLMIQLADPSDAAKILRAESKYPQRFKFPAIDYYREKQQKIAGVFFADGPEWHKHRSVLSKRMLRPKHVAEYAVEFNEIITDFIRRLRTIREHSGTEKANEVLGIDNELFKWSFESVAFMLFDKRFGCLEPHVNIEAQTFIKAVGEFLHSATTIGFVPVWIHKIYETKQFKKFFKSFNTMYEYAELFIKRRLNELEVKSRGSPSSTTDDDNVGFFEFLLSSGKLTQDDLLASVIDVLFAGVDTTSNTMQWVLYLMAKNPEKQEILRQEILSVLGDEIIATPTTLAELPYLKAWVRETLRMYPVLTALFRILPKDMIIRDFNIPAGTQVNLLTYSM…	NW_015441233.1	384073-382561	384073	504	1
CYP3094B1	MILEAAIFFVCAVICVTIFIARSRSQAQKKVAPGPSPYPLIGNLVDLVGKPGHVAMTELAEQYGKIYTIYMPGGERCIVVNSIDLAREALLTKRDDFSGRPATFIAGYLSRGLKDIICADFTQTMIYQRKIAHSALRMYGSGMKHLEAMICSEVENLAQRISPRQGKPFDPKEEIQLAVLNVICAMVYGESYEIDDEEFVRIVKYNDEFIKLFGSYNILDLLPWLRFFPLKDMKRLRDSRAIRDEILDAKFQEHKQRFEEDNANNNFEITDLTDALLKAHYEAQQEDGKVKQMLTEDHIVMTMNDVFNAGLETSSTTLRWLVGYMATYPEIQARIHAELDDVIGSGRFPRLSDRGSLPYLESTIAEVLRIRAIVPLSLPHKSTCDTSLGGYDVPKDTML…	NW_015441694.1	147013-145499	147013	504	1
CYP3094J1	MISAVLLYSVLSHVTDNPKLPPGPMPLPVIGNMLQMGMTPHYGLTSLAKKFGKIFRLSVGIHRMVVVNSIDLAREALVKKSSDFAGRPRLYTADLISRGGKDIAFSDFSPTWKLQRKVAHSALKMFGQGIKPIEEKVSQEIDELITRFQAVEGLAHDPQDDVVLAVINIICAFVFGSRYDLENPEFRTILNYNEQFVQGFRAGNLVDYFPWLRHFPSKGLDLIRQAVKDRDIILQRKFDEHKSSYQDCVTRDLTDALIKAMKESQSEEQDKVLSLTEDHVVLTMNDIFSAGLETTSTCVLWALAYLVRNPKVQQRIHQELDDVIGRERLPELADKANLPYLDATIMEVLRYSSLVPLLFPHSTTADTTLDGYEIPKDTIVLFNVWAMHHDEKKWDRPFE…	NW_015441775.1	114313-112856	114313	485	1
CYP3339A1	MGDSVKQDVDRSSSATDFFSLFIGLGVVALLYFLWKEASYELIRRKINAPGPRRWPMFGNLLETRKFNGYHLMLKHYYETYGKVFCICLGRQPTVVVADPELLKQIMVKDFANFQNHFTQIKIPGAMGKSVFLARDETWRRIRSTLSPSFSAKKMKGMVALIEESIDKLMVKVEKVARTESVDMLEWFSRMTLEVILSTAFGVQADILNDDQSIMLQRAKAVFKTSWTTDILRRFPLGVTLLILVGNIFQRRGFFDKIAAEIVEKRRKSGPTARQDLVELMLTAHEDSTQKGASKLTNEEIVGQCVIFLLAGYETSSNTLGNIIYQLALNQEVQDELRQDVMQALKTNPGSKLYDIAHNIEYMDCVINEALRLNPPVAQLNRECTEDYEWNGIRIPAGL…	NW_015441116.1	319836-322813	319836	516	2
CYP3339A2	MNVPGPKPLPFLGNMLELKKYGALHLLHLDYLKKYGKVFTVSLGGKPSLVVGDPELLKQIMVKDFPHFRNRFAIQKPDEVIGKNVFIAREDDWKRIRNTLTPTFTAGKMKLMLPLIEKSCDTLMKKLEGVCDTDQNVDMLDWFSKLTLEVILSTAFGVDAKIQNGENQKMLSDARKIFKIPQTLRQIARLPFGNFVLRTIAKITGTSPNNLAKVAKEIIQSRREQGLTDRKDLLQLMMAANDETTADGVSKLSDEEIVAQSVVFLLAGYETSSNTLSFTLYYLAVNPDVQDKLRSEIQEALEVNAGKKTMYEIASDIEYLDCVIKESQRLDPPAAMVNRECHEDYHLNGMCIPAGTEVVIPIYALHHDPDAWDEPEKFDPERFRGSAKDTRHAFQFLPF…	NW_015441490.1	130606-132695	130606	462	2
CYP3339A3	MASLLHQLVSSLEGLAAFFTHHATILVTALLVASFLYWCGTHSFGALKKLNVPGPKPLPFLGNFLEVRNYDGLHLMHLDYFKKYGKVFALCLGARPSLVVGDPELLKQIMIKDFPRFRNRFQFEPPPNTSAAKNVSALRDNKWKRVRTTLTPTFTAGKMKLMVPLIEESCDMLVKKLEEFCDTDQSVEMLDWFSKLTLEVILSTAFGVDAKILQGENAEMIRETKKFFRIPQVLLNLTRLPIGNLVMKFLMKLKGINRSYMEKVAEEVVKRRRQHGHNARKDLLQLMMTAHEATTDEGIVKLTDDEIVAQSFVFLLAGYETSSNTLAFTLYHLAVNPDIQEKLRAEIKAATENDLRKRPLYDVCSGLEYLDCVIKEALRISPPAVFVNRECAEDYNYNG…	NW_015441490.1	134364-136327	134364	511	2
CYP3339A4	MAFLTQPSLIVSLLTFIVLFIYWSGTRGFADLKKFKVAGPKPVPFFGNILETRKYGGLHLLHLAFLKTYGKVFTICLGAKPSLVVGDPKLLKQIMVKDFSNFSNRVFLGPASNRAFSKSLVGARGEDWKRIRTILSPTFTSGKMKIMLPLIEKSCDTLVTKLEEIHQSVDILDLFNKMALEVILSTAFGVDAKIQMGENLELLREANNLLRIPQVIRQLTRLPLGKFVLRFVAKLKGTRRNYLQGVAEDIVKSRRQQGFTERRDLLQLMMEANVETTNQGVTKLTDEEVVGQSLVFLIAGYETSSTTLGIALYHLALNQDIQDKVRSEIKEAMEASENESTLNEIVSSIEYLDCIIKETLRLNPPAPFVNRECTEDYNHDGIHIPAGTEIIIPIYALHH…	NW_015441490.1	138164-140185	138164	493	2
CYP3343A1	MPSAERKPPGPWSLPIIGNIFLFGSAPHKNVTRLMQHYGKVFSMRLGSREVIILNDINTVKEALLQKGSDFSSRPPLHSFIFSSRGERTVAWPVFGPKYIKNKRATELAMRTIIDNDSQFSSTVIKETNSLIQSFLNSGEKRFDPAYMLKHLACSLQFCLFFGEKLRDSYVKKAQFMMDGSTDFIENSAVGNSVDFMPWMQVVFRKQVKELEDSVGELSDFVRKIYLIRKKESKKSDIQETTFNGALAQVVQNKEALSFGNEHLEDADPDNSSNNFDDERLVNIIADCFGGGYEKLSTALRWAVAYLVSHRDVQSELQKEITRVKGSAPLTLQDKDSLPLLEATILEILRMSSFLPFALPHCTTRDTSVAGYPLPKGSIVFVNLWGCSRDPDYFEKPHE…	NW_015441057.1	1501913-1500372	1501913	481	1
CYP3344A1	MQLSNLRRNTPPGPFGLPIVGNLLQLGDSPHVALSEMSKVYGSVFSIRLGSRRAIVLNSHDVVKEALSKKARHFSARPPFHSFHISSNGGRSIAFGDFGPGHQRKKKLATRALYAVFSNVNRFDKLAQEVTERLCRSLTEAGKCETVDISEHLRTLVINFSLRIVFGDNLKKDYTMELQNVLQRGNDFIENNPTINLVDLFPWLRFALSRPCKALKESVKELMDFVKSVYSLHCHSNVEEAGVNFAATVEKVIQDEMLVADPNFKTNVHEASDDLLDEESMVTLLADVFGAGIDTVSATLNWALLFIVRNPELQHELQAELKREIGMDRLPNLDDRARLPLLQATVLETLRKAAVVPLAIPHYATDDSSVGGFSVPKGTLVLANLWAVNHDAKHFDRPE…	NW_015441278.1	310126-308657	310126	489	1
CYP3346A1	MAKQYGDIFSLKLGNRLVVVINGVKAIQETIIKQSIAFAGRPNLHTFQLANPHGSSLTFADYSRQWRQTRGISVRAMHNFVKSTDVLQKKLLHESQRMIHCLKNEMGKPVDVLITLKCATANIILDALFGVERSYDDEGLLRILHLAENHRRAVSGSSHVDFLPLLKYLPNKTLENLVLTMKVVLDDVARMFEKNKETYFGGQVRNIADSFINVVEKESEKETVNPLNGKARESMAALLDDDQIVAVLGDLFGAGFETSSSELYWSLAYLIAYPDIQRSLREELDLVIGRHRLPTLQDLPSLPLLQATIYELLRVTSIAPLAVPRNTTSEICVRDFIIPKDTIVFVNLWSVHRDPEMWKDPDVFNPRRFLDSKGQLIDPKFLGGFFPFSGGRRKCPGEA…	NW_015441134.1	229564-231033	229564	489	1
CYP3346A2	MAKQYGDIFSLVLGNRLVVVINGVEAIQETIIRQSIAFAGRPNLYTFQKANPHGSSLSLSDYSPQWRVSRKISTSAIQHFARNTDVLSEQLLVESQRLVQYLSQQTNKPLDPSKTFKCAAANIILHALFGVSRAYDDEHFQKIFEITEHYGKAIEGSAYVDFLPLFKYLPNKLLTSLTVLMKSLHDEINKMFVENEASYIDGRIRNIADSFISIVKKEPEKEKEKTETGWKTKSTASLLSDREIVAVLADLFGGAIDTSTVSMQWSLAYLIKYPDIQQQLHDELDRVIGRERLPTLRDIPSLPLLQATVYELLRVTSIAATAVPRSTTADVNVREFVIPKNTLVFINLWSVHRNPEIWKDPDVFNPRRFLNNEGQVIDPKALGGFMPFSVGRRQCPGQA…	NW_015441134.1	235937-234507	235937	476	1
CYP3346A3	MAKQYGDIFSLMLGNRLVVVINGVEAIQETIIRQSIAFAGRPNLHSFQKANPYGSSLVLSDYSPQWRVSRKISTSAIQNFARNTDVLSEQLLVESQRLVQYLSQQTNKPLDPSKTFKCAAANIILHALFGVGRPYDDEDFQKIYEITEHYGKAIEGSAYVDFLPLFKYLPNKLLTSLTVLMKSLHDEINKMFLKNEASYIDGRIRNIADSFISIVKKEPENEKEKTETGLKTTSTAPLLSDREIVAVLADLFGGAIDTSTVSMQWSLAYLIKYPDIQQQLHDELDRVIGRERLPTLRDIPSLPLLQATVYELLRVTSSAATAIPHSTTADVNVREFVIPKDTLVFINLWSVHRNPEIWKDPDVFNPRRFLNNEGQVIDPKSLGGFMPFSVGRRQCPGQA…	NW_015441134.1	251048-249618	251048	476	1
CYP3346A4	MSKKYGDVFSLMLGNRLVVVVNGVNAIHETIVKQSIAFAGRPKLHTFQIANPQGNSLSLSDYSHQYRLSRKISVSAIHNFVKNADALEEKLLHESQRLIHYFQKMKGKPVDALLTLKCATANIILNALFGLERSYDDAGLLNMLNLSDNFRKSVTGSSHVDFLPLLKYLPNKALSNLVFMMRTFLGNITEMFEQNRDTYVGGHVRNIADSFINVVEKETEKEKEDRQPGEDTLCMAPVLSDEQIVPVLTDLFGAGFDTSSVTLYWALAYLMAFPEIQSQLHEELDRVIGRQRLPTMSDLTSLPLLQATVLELLRISSIAPLSVPRSTTAETTIRDFKIPKDTLVFVNLWSVHRDPETWKDPDVFCPSRFLDSQGQLIDPKFFAGFLPFSAGRRKCPGEP…	NW_015441134.1	412584-411106	412584	492	1
CYP3355C1	MFEALLWAVLVFVVLAFVFNGISEAKSLPPGPFPWPIIGNVLKLAADTRHIDLMAMEKEYGHVFRVYIGSQLVVVVSGVEAVREVLVTRSAEFAGRPRVYTADVYSQGKAIAMTDYSPQWRLHRKITVSALKTYMNEVLKERKVIEDEFDLLLKKVAVWNGKPHDVLKEIRLAVMNVICALAFGYRYELDDPEFSRLLEMTNGVAQMVASGSLVDVFPWLWFLPFKSIQVLKNSNKDREELIGGIYREHVKANSFQNPRDLADALLKAKKEAEDEDKSVKGFLTDEHLIFTLSEVFMAGMETTTSTLGWALLYLIHNPHIQDILHQELDDVIGKSRLPELADKNNLPYLEATIAETLRVSCLVPLSVPHKTTVDTTLQGYHLPKDTTLLVNLWSLHHDP…	NW_015441160.1	300449-298962	300449	495	1
Partial CYPs
Name	Sequence	Contig	Region on Contig	Start Position	Length (amino acids)	Number of Exons
CYP3094H1	MIQGLVNSIMNYPPGPIALPIVGNLYNLGILPLVNLTKLSRKYGGVFQIFLGSQRAVVVSDIDSARDALLKNVNDFAGRPSVLSGDIFSHNGQAIAFGNFSPAWKVQRKIAHGALKLYSTGTEKLERVIFREVQEVIEQFDLSKEEPFDPHDSISLGVLNVICALTLGSRYSASDPEFRKVVELNETFAATLGLGNLVDIFPSLKHVPFDSENIRRLKRAVKERDRILTRKYKEQLDTYEEGKIRGFTDALIKVMKDTENNEQRLTSLLSEDHVLMSMADMFAAGSETLTSTLLWMILLFNNYPDVQAKVHEELDEVLIGPKRLPCLNDKKNLPYLEATIAEALRLRPVAPLGVPHKALVDTTLNGYNIPKDTTLILNIWAMHHDPKHWRNPSQFDPNR…	NW_015441202.1	654730-653292	654730	440	1
CYP3094K1	MHRWSRVRNLPPGPRPLPVIGNLLEMKKFNHVTMAAWAKQYGGIYMLTVLGKKVFIVTDIELAREALLRQGNVFAGRPTSYVMSCWYEFQPGLVFEDYGATWRLLRKVSHSALKMYGSGIEDLENKVYREVDELCIQLDQTQGVPLDLRKLISIAVSNVIFSCLFSYRYAKDDKHFKECTDLVDGVMHLTGAADLLETFPIMKFLPGEIHSRIKNTTFLKKKLLTSKLQERKETYKEGVIRDITDALIKALHDDHKEDSKTKGILNEQCLKNAIGDIFVAGSDITSLFLTWSFLYLAAFPEVQARIQQELDDVIGPDCKIRFKDKSSLPYFEATIAEIMRHGSFAYFSLPRKVREDTTLGNYDIPENSQVIVDIRSIHHSPKHWRDPGSFDPTRFLNPE…	NW_015441295.1	1354-451	1354	451	1
CYP3094K2	MHRWSRVRNLPPGPRPLPVIGNLLEMKKFNHVTMAAWAKQYGGIYMLTVLGKKVFIVTDIELAREALLRQGNVFSGRPTSYVMSCWYEFQPGLAFEDYGATWRLLRKVSHSALKMFGSGIENLENKVYREVDELCFQLDQTQGVPLDLRKLISIAVSNVIFSCLFSYRYAKDDKHFKECTDLVDGIMHLAGAADLLETFPIMKFLPGEIHSRIKNTTFLKKKLLTSKLQERKETYKEGVIRDITDALIKALHDDHKEDSKTKGILNEQCLKNAIGDIFVAGSDITSLFLTWSFLYLAAFPEVQARIQQELDDVIGPDCKIRFKDKSSLPYFEATIAEIMRHGSFAYFSLPRKVREDTTLGNYDIPENSQVIVDIRSIHHSPKHWRDPGSFDPTRFLNPE…	NW_015441295.1	408822-410175	408822	451	1
CYP3342A5	DFLDLMLMAAQDESLPKSKRLSDSEVLAQSVIFLIAGYETSSNTLGFVAYFLATNPDVQEKLQKEIDSVWDDESKMPSYETVNGLPYLDMVISETLRMYPPAVATMRTCTENCMLKDLKVPKGLAVTIPIYSLHMDSKFWPNPEKFDPERFTPEAKQSRDPYVYQPFGHGPHNCVGMRFAQMEMKLVLARILKKYSFQAAQDTKIPPEVVIRATLVAKEVKLKLTKRE	NW_015442027.1	4888-9879	4888	228	2
CYP3346A5	LKNRLHCLKNEMGKPVDVLITLKCATADIILDALFGVERSYDDEGLLRILHLAENHRRAVSGSSHVDFLPLLKYLPNKTLANLVLTMKVVLDDVARMFEKNKETYFGGQVRNIADSFINVVEKESEKETVNPLNGKASESMAALLDDAQIVSVLGDLFGAGFETSSSELYWSLAYLIAYPDIQRNLREELDLVIGRHRLPTLQDLSSLPLLQATIYELLRVTSIAPLAVPRYTTSEICVRDFIIPKDTVVFVNLWSVHRDPEIWKDPDVFNPKRFLDSKGQLIDPKFLGGFFPFSGGRRKCPGEALVMKTICVFLAVLIHSFRFTQDGLPTDYQGIDLKGDHGLLLLPKRFYVRIEERN	NW_015441134.1	239373-240452	239373	359	1
CYP3346A6P	LYLLTYNWESIEFKVVSLSRQFSGSFFFQLISPSSQLSLFSFKIGASFRIGKDPHLDFTNMAKQYGDIFSLKLGNRLVVVINGVKAIQETIIKQSIAFAGRPNLHTFQLANPHGSSLTFADYSRQWRLTRGISVRAMHNFVKSTDVLQKKLLHESQRMIHCLKNEMGKPVDV*LTLKCATANIILDALFGVERSCDDKGLLRILHLAENHRRAVSGSSHVDFLPLLKYLPNKTLANLVLTMKVVLDDVARMFEKNKETYFGGQVRNIADSFINVVEKESEKETVNPLNGKASESIAALLYDAQIVSVLGDLFGAGFETSSSELYWSLAYLIAYPDIQRNLREELDLVIGRHRLPTLQDLPSLPLLQATIYELLRVTSIAPLAVPRNTTSEICVRDFIIP…	NW_015441134.1	244401-245876	244401	491	1
CYP3348A1	YFCSVIVGYKDLSFAMYGPVWKFYRKLFMSALRQYLSNIPLVQDRVTTQADKLVQFVEEQRGELFDPADRLMKAVADVICGITFKDGSDTRHADLDRMLKLNAAFIANVDDFQKVVILDFFPWARYLPTEVYERWTAPIREIQGIIRKRLRQTKETFDPTEPVEDFMSALLRAQLDFEAECKTEEEKAELFSEDRFVTTIHDMFAAGYETTSTTLRFVIAFLVTYPKYQEDIQRELDDVLGPKQPRISDRPHLPLVQAVILESLRVGNLVPFAVPHVAIEDTTVRGYRVPKGTVVFPNTEAVHMDPNCWDDPTVFNPYRHIDESGKLIANPDNFFPFGAGRRVCAGEALAKIELFLFTAILFHRFTFVAEEGYHLQMKGATVQFPVRYKIRAIDRKP	NW_015441267.1	472438-473631	472438	397	1
CYP3348A2	YMHMSPLIVGNKDLVFATYGPAWKFYRKLFMSALRQYLSNIPLVEDRVTAQADKLVQFVEEQRGELFDPADRLMKAVANVICGITFKDGSDTRNPDLDRMLKLNAAIVANVDDFQKVLILDFFPWAHYLDREVYERWTAPLLEIHGIIRKRLRQTKETFDPTEPVEDFMSALLRAQLDFEAECKTEEEKAELFSEDRFVTTIHDMFAAGYETTSTTLRFVIAFLVTFPNYQEDIQRELDDVVQHKRPRMSDRPNLPLVQAVILESLRVGNLVPLALPHVAIEDTTVRGYRVPKGTIVFPNTEAVHMDPNFWEDPTVFNPYRHIDENGKLIANPDNFFPFGAGRRVCAGEALAKIELFLITAILFHRFTFVAEEGYQMQMKGATVQFPVRYKIRAIERKT…	NW_015441267.1	477894-479102	477894	403	1
CYP3348B6	GKDIALGNYGPAWKFHRKLFMTAVRQYLSDQKLVEETISKQVTMLLEYFEEQNGKDFNPGQILMETVANIICCISFGGHFDSSHPDFEELLRLNNESFTDAELNSDIFVLDIFSWAKYFPFKAYKRLNNLTTRVFEILRKELKKQQENYDPAAEVKSLIQMLIKERDAAEAEIEEDEKTALLSDDYIINTLEDMFSAGYETTSTTLRWVITYLVNNPEYQTMIQEQLDEVVGKGRMPRLDDNLNLPLIKATVLEALRLGNVAEVALPHYTLKDTSLGNYRVPKDTVVMVNLRCIHEDPSCWENPEAFNPQRHIDSDGNLITNSGNFLPFSAGRRVCAGEALAKVKN	NW_015441874.1	34620-35662	34620	346	1
CYP3348B7	GKDIALGNYGPAWKFHRKLFMTAVRQYLSDQKLVEETISKQVTMLLEYFEEQNGKDFNPGQILMETVANIICCISFGGHFDSSHPDFEELLRLNNESFTDTELSSVIFVLDLFSWAKYLPFKAYKRLDDFTIPIFEILRKELKKQRENYDPTAEVKSLIQMLIKERDAAEAEIEEDEKTALLSDDYIINTVSDMFSAGYETTSTTLRWVIAYLVNNPEYQSMIHEQLDEVVGKGRMPGLDDNFNLPLIKATVLEALRLGNVAELTLPHYTLKDTSLGKYRMPKDTVVMVNLRCIHEDPSCWENPETFNPHRHIDSDGNLITNSGNFLPFSAGRRVCAGEALAKVRNIE	NW_015441874.1	28799-29847	28799	348	1
Additional CYPs from this species
The genes listed below were not included in the phylogenetic tree
	Sequence	Transcript ID	Notes
CYP20N1	MGNLLDVGKAGSLHEYLMLLHEKYGAIAGFWWGKMYVVSLASPEYWKEVQPIFDRPPELFKLFEPLIGKKSIQFANGPSGRKRRQIMDRSFSHESVKDCYEYLVQIAKETANQFSTSSLQEHVPLGKSMVAMAIRAISAVGMGRAFRDKKEIDKLSTVYELCWNEMEARLTEPAPEPHSKREKDFQDAKTTMQNIVKEYMKQRREDKDKAERLFIDSILDCEFMDEEEMCDNIMSFLIGGFHTTGNMMTWCLYYLTKHPEVQEKVYEELIEVLGDEDIKPQVASELKYTRQVIDETLRVSVLAPWGARIHEFDLQVGEYIIPKETPMLLPFGVVLQDPNLWPEPQRFDPDRFNSDNLKQLPNLSYQPFGFAGKRKCPGWRLSIAEGLVFLSVLVKRFKF…	XM_015902826.1	Full length
CYP443A1	MQVSPIHDEDKEVPGQDKWTFFHMAELVMKGHGYFYKRRRKYKSSVFKVNMGVKGIHVCDKKAMKVFFDMSKIYKEPAFG RLQYNICLLDGYTPSMFSNGIPHQKQKAFLVQICKIAQRSKIFDTSLKLIKEYSRNWEKADSQLKATWELSIMDLISDIF TEAFLGTRLDQKYMYNFLKGSWGKGRVLRKAMEAASCLKQTLQGTKGSSDVIEILKMAVNAGITEDQALMDILFMLNFNA YGGVSGVLRTCLARLYVLEEDYKQRMKNELKTILSNKELSEASLEEMILLHNFILEVLRMHPPVPVFFGRARDDFSLETE CGTFIVRKDQLLVGNVHMAHRDSSIFDQPDTFMPSRFEDESIIDHIIYGYGPFHQEATPQNHRCPGQDIMLQILK…	XM_015910122	Full length
CYP443D3	EDGEPEPIPIPGSFNGRIPQIVELVTKGHHFFQSRMESLASTVFKCSFFGAPFVAITDYEGMQCIFDPKFVEKEPGFGNFRFNQSLLEDHVPSMFENGDRHSNSKSFLIAISQNMLRMGRLIPNVMDIIPEHLIKWNFKEGQGSPSQEEWEERILHLSMDILSECMLGIRLSGHSFIQWRFEVLKEERTCFGKPRGKYKKALHAFNHLKEAIANAPDIEPVFKEAEKVGLTEEEAVLEILWMLNFNAAPGTGAAMRSAAARLSVMTTEEKRELRSEIRECLGPIGLNLKTLHKMKKLDNLVCEVLRLYPPVALYFGVARRPFIMKSSSGTYHIQKGQKIVGSCHLAQRDKGVFSVEGCKEVDEFDPTRFNKKGLKSKLICAHGPLSEPPSPDNHKCTGT…	XM_029329094	Full length
CYP3390D1	MILETLFNISGWKFLLLSVFLLVLTWLLYKVVEERLSPLQRIPCPPGGLPLIGHLFTLYRSGGFLEMVRVWTKQYPSMFILHPGFGFGIGGYMVYVTDPELIRFVAIRNAHKFERTQFLNWVVPSVSKGLFGSVGKAHARQKRIIGPAFSSANLKGFLNVFLENSEKLVQHWCDQLLKNTAEPKQFIDVKVLDDLSHLTLDVIGQSAFGYNFNSILGGDSKISIAFATSLSAMDFKYLICKFLIPFFDYLPLPVNKKFQKAREISDNTVLEVIRERRRQKTEGSHSSAKKDLLDLLMDMHDEETDSRMNDEELRSQVFTFILAGNETSSVSMAWTLYELARNPQVQEKLRAEVEAAFGDSDDLTWEKVEKMHYLENVVKESLRLHSPADITSRVALSDA…	XM_015898591	Full length
Total number Genes	28
Full length Genes	18
Partial Genes	10

## Sheet: Aurelia aurita
Aurelia aurita
Complete CYPs
Name	Sequence	Contig	Region on Contig	Start Position	Length (amino acids)	Number of Exons
CYP4KY1	MSLCVVCDFVWLTVHMCSRADKITAAAMYTSISYAFLGCLAIVFILKELWRRWVGRLKGFRSPPMHFLLGHSLMFPTDPCKLITLIRDWLVEYNKELMIYLGPHRFFLSGNPDHSEILLSSTKTITKSHEYSFLVPWLGTGQILFILSSTGSKWKTRRRLLTPAFHYGILEDFAEVFQEQSAIFVEQLKPLAINKEKFNICTYATNCTLDIICETAMGVNCGAQVDATTEYPKAVLSMCSIIQYRQIRPYLWPEFIYNLTADGKEHNRSIKILHDFTVKVIKDKIKVRKEKDDEKQPEKKRRAFIDILLDCYEQGEIDLDGLREEVDTFMFEGHDTTAAGVFWTLYIIGRYPDVLKKAQEEVDRVWADAGNKSFLELAKEMTYLTSVIKESLRLFPPVP…	Seg2883	75797-50683	75797	525	13
CYP20N1	MRQLVSHVSTDYAAFAVTALVVLIVTLFYLFLLDRKKNKLSCPGLEPSDSESGNLTDMKKAGSFHEFLVDLHKRYGPVASFWWGKQLAVTLGSPKVFKEVQTLFNRTELPFLMLVPLIGKHSIQFANDGRGRKMRQVLDRSFSHSATASYAAIFNEIGDEIVKKWKTIPEDEHVPAREYMLAMVLKAIMLTSFGDFFKSHKQIVEFEKAYDICWGEMESRLMDGLPDPGSDREKKFEEGLRKMKDMTQKVIADRKGQPDKTKHLLIDVILEDRDVFPTDDTVFDNVITYIIGGFHTTGNLLTWVLHFLSLHPECQEKLFAEIKEIVKDDTVTADHINELKYTRQVLDETLRCSNLAPIAARYSDYEIIIDGHVIPQKTPIILSLGSVLQDPEIWPEPSR…	Seg2015	20816-51247	20816	481	11
CYP3336A1	MELSSIDVSSIDICIAICIFLVSLKVVQWWRDPMRKIPGPPGLPLLGNTIELVTSDDLHALRLAWSRKYGKIYKNKLIFDNARLQITSTEYAKHILVTNNANYAAPKEFALKLLPGLGNSLLTSNGKDHSIQRKHLNPAFSLDSVKDYVTIFNQKGNELVKYLEDKLKSSNGKSIEMELMTKFNHVTLDIIGLCAFGYTFNSVMNGYDDESKCISQIVSGGSGVHRKLIESKVPLLKLIPSKGREEGKNAEKACENLIRKVIEKRQEEQKAGMEMKEKDLLRKLMVLHQDDGNGMSSKDLYHQIFSFIFAGHHTSSLTMTWTLYLLAKHPEFQDRVRQEIAEVMDDKSEVSYDDTSKMKTLDNCIKEAMRLYPAAPLIGRRCVKEDKIGPYVIPANTEL…	Seg1889	44610-55908	44610	502	6
CYP3336B1	MIAEILKDISSLQVFFAVIAIYVISKFISWYRNPLRKIPGPKGSLLFGNTADFSAPNDGHKVLVEWGRKYGEVFKTWTSVGGYRVYFLNPAHIKQILVSQSTKFERPKFLRKLLNFTGRTLFSSEGKEHAMQRRMLNPAFSYGNVQKFLPLFNEKAKQLVKSWKHKISDMGGPFEELILDEFTHLTLDVIGESAFGYSFNSILKGNSKESMATDTILRGGFNLQRRALESWFPFLKYIPSEEREKVDEATNVMNGIIDKVIKDRREEMASGENPERTDLLQSLLKMKDDAGDKFADEDLNAQVRMFMIAGHETTSMSLTWTTLLLAKHPEFQERVRDEIRSILKDEEEITGDHLQKMKFLDHCIKESMRLYPAAIQTGRGCLVDVKIGPYEIPKGTVVF…	Seg1077	298433-291781	298433	504	5
CYP3337A1	MVIAEVVVTALMIAVILAAIRKIYEAIHGLLLGKNDGGLQIPSPPAYPLLRHFPYFVSNFNDDKKLVEWSKTYKKEGIFSFDVLLGPTRICVFKEEFMKQILVTNCTKYDRTPVLGEIFPSIKNGLFLSAGKEHAWQRKMLNPAFSYASVLEFLTTFDKNVDNLIMVWKEEAAKSLTNVAEIDIHKSFCRLTLDIIGETAFGYKFDTVVSGENKVSRAVDTLLTGKISVMSRLMRRIIPFYDKLLDRFSTELTEAQQITNAAVNEKPEGLKSTGAQMLQKLERFAEENGVECKMRTGRKLTDELISAQVYTFMVAGFETTSVGLTWTFYLLAKHPEIQEKARKEAKAILNGSTTMTANQVDKMDYITAVINESLRMYPPAAIFMREAKKDDQLGDYKIP…	Seg1850	52731-41580	52731	474	7
CYP3338A1	MFHCCRRVALTGSCTSSSLFIQNATRATSLLGTRAVSSSFICNSDDMKGLSVMPGPTKVPLLGNLFQMQKAGGLHKFNHALQLFQKQYGKIFQLKLGPERMVVISDPDLIEEVYRQEGKYPRREKSFPAWSRYHKKHNVPEGVFLMNDEDWHRHRSALNPKLLNIKQVEHYSPDFNVVIDKLMIKLLSMRNRDFEIENIEKQLFRWSLESVCTVLFEKHIGCFSRHSDPKYEEFIDAVQVLFDVIFDLVFQPPFIDKIMETKPVKDLNKCMDTIYSVADNEVKERIKVFDEKHGGKIDEDTAKEFIPYLYYVAEMNLADIKSDISSLMMAAVDTTSTSMQMLLFNLANNQKVQTKLHEEISQFLKPDEPATPEMLKKMPYTRAVMKESMRLHAVVPFNA…	Seg613	125090-197590	125090	521	8
CYP3341A1	MDVIKDSFEVAREHWVLSSLLLLVLLIYAHYVATFTTLKKLGIKGPTPLPLVGNAISVIVNGDSLHDFISNCIKKYGSVFGLYFNKDPCIVVSDPEMIKTIMVKDFEKFHDRPDGGLEFPEPLASMLTVVTGQRWKHIRSILTPTFTSGKLKSMMYIMHEAGDVLVKKMETAAKAGTPIDIHEWQQGVTMEVILSAAFGVKAECQTNAKDKITGYARNAMNPKPWPNLAVMIPFIGPKIGKAIAISPLGFSWGPMIDIAKGIIKNRQNNPTGIRKDMLELMLAAQHPDKKGHILSDDELIAEMVLFLLAGYDTSSNVLSLLCYHLAVYPEIQEKLVEEIKQVCELPDTTNYEEIKNMPYLEACISETLRLYPPGFIISRTVDESCTIEGVPFKKGMSVL…	Seg1845	67230-62071	67230	501	5
CYP3341A2	MDVIKDSFEVAREHWVLSSLLLLALLIYAHYVATFTTLKKLGIKGPTPLPLVGNAISVIVNGDCLHDFMSNCIKKYGSVFGLYFNKDPCIVVSDPEMIKTIMVKDFEKFHDRPDGGLEFPEPLASMLTVVTGQRWKHIRSILTPTFTSGKLKSMMYIMHEAGDVLVKKMEIAAKAGTTIDIHEWQQGVTMEVILSAAFGVKAECQTNAKDKITGYARNAMNPKPWPNLAVMIPFIGPKIGKAIAISPLGFSWGPMIDIAKGIIKNRQNNPTGIRKDMLELMLAAQHPDKKGHILSDDELIAEMVLFLLAGYDTSSNVLSLLCYHLAVYPEIQEKLVEEIKQVCELPDTTNYEEIKNMPYLEACISETLRLYPPGFIISRTVDESCTIEGVPFKKGMSVL…	Seg1372	139550-143971	139550	501	5
CYP3341A3	MNMIMDVIAILLEHWVLTTILTLTALLYWHYVANFSELKKLGFPGPTPWPVLGNLVNVMSNKGLHIFLQIAKEKYGKVFGVYFLKYPSIVVHDPEILKCVLVKDFDKFQDRTKPGFKLDEPFASFLTTLEGQRWKNVRNILTPTFTSGKLKQMTTMIHDAADTLLGKMEKAADEQKAFDVYEWQQGVTMEVILSTAFGVKTESQTNPDDYLMNLSKKAMERQLSILIASVIPFIGQWITKKLAASRFGCSKTKLFGVAREIIEGRKKIAAECQRKDMLNLMLAAQDPENKGHKLTDNEMIAQMVLFILAGYESTSNTLALTCYNLTIFPELQERVLNEIKDVCSSQDTCTYDEINQMPYLDACISETLRLYPPAVVTARNCLESCTINGINFKKGVAVL…	Seg4099	27046-18134	27046	502	5
CYP3350A1	MELITLFLILVVFVTIAVKIVAQYSCRDSKFNLPPALPYLPIIGNIHYMKGKQPHKLFHDISKRIGPVITFWFGKKAVIVVNEINVAKEALLKQDSVFAGRPQRYTGKLYSRIFKGVIVADYGEDWRKTRKLAHQALKTYGMEQMKTEELITTECKDLIKRLRKQMLQNDVIDISKDIGLSVLNVICSLCFGNRYEPHDREFLRIVEANAWFVEGITCSAVIDSFPCLAYLPYRKLQLLTKYIKVRDEILDRKFKEHEKTFDGDNLRDIIDYMIDNERKEKNDDDQSNRDNQIVLISDLFIAGSDTTTTALLWAFLYLSKWPKKQERLHKELDAVIGTKQPTIMDKNKLPYLQATICEVLRLSSLTPLGVPRKAMEATSLGGYDIPKNTTVIFNMYAMN…	Seg599	91957-94204	91957	499	2
CYP3350B1	MLEIVVGASICVVLALALGLFIIKRRSTVDKWANLPPSPPVFPLLGNLLYLKKDPHLAFIDLAKEYGDIFTFWFGRSKPVIILNDQKTARQAFINGAQALSGRPQRYTGSIYTKNFKGVVLKDDDKEWTFMRKLGHQALKTLGEEKFFTEQIIHDECNALVDRLSRRLSLNNVIHISKDMELSSLNVICALLFGSRYSEEDPEFHRISKANSWFIEGIKSGNMVDGFPILRYIPYRPLKLLKDFVKVRDEILERRLKEHEDTYNPGVIRDFTDALINSHIQQNSNKGEDYTREHSLALMADLFLTGTETTGTALKWAILYLSLWPDKQEKAHKSLECLQGELPKYSDRKILPYIEATMSEVLRMGSLAPLSVPHKATVDTELCGYHIPKGTILMMNAYS…	Seg2011	138530-140026	138530	498	1
CYP3351A1	MIKRRLQNDPPGPLPLPFFGNLFCFGTKMHVSLTNLRQRYGPVIKLRVGWRSFVVVNSIEVMREALNRRTHDFDGRADSFIGNMMSYGGNDLVFASYGEKWTLHRQLCARGLSAVAGNRLSHLEAIVAKENNDLLKRILKNEDGPFDPQIDISLAVLNIIRQMAFGTRFSEEDPEFKKNLQYINIIASSFDIIGNAIDCFPFLKLFPFGKIKSLKDAMKTRDEIMSEQLKRHQENGLKLHDFTTFLLNSNDTGKSGENALSDTQLKLLMFDLFGAGVDTTIVALLWAIIYLIRWPECQRKIQTEIDELKPECTEVTIADKKDFHYTQAAVCETLRMCSLFPISPRKATRNTTLEGYDVPKGTDVCFNLWGINHDERHWKYPEVFMPERFLRSDGKLKTL…	Seg2553	71736-73965	71736	469	2
CYP3352E1	MILTVIAGLFGIGFIYLVSKYLIQLWNLRYYPPGPIPFPLIGNLHQLRNSPLLTLQNFAKKYGDVFSISLGHKRIVVVNSVVPAREALVQKSVEFAGRPQDIYTAGKITRGFKDIAFADYGPVWQATRKLAHQSLKLYGSGMERMEDFIQEEADDLCKRIEEAKGKPVNPHQDLALAVINIICSLVFGKRYEKDDPEFLKVVRYNSLITQGFSHTGAAAVLPWLRFFRNKGYEKINTGIAIRDAILREQLNLHKQSFQPDNIRDLTDALLLEVSKEEFKEMNERRYPTDDHIEMILHDAFTAGSETTTTTLRWANLLLVRNPKVQEKAAQEILNVVGSDKSPRLSDKDKLPYICAVVNETLRISSVIPLGVPHKTTADTTVAGYKIPKDTQILFNNWAI…	Seg539	58710-56362	58710	499	3
CYP3352E2	MILTVIAGLFGIGFIYLISKYLIQLWDLRYYPPGPIPFPLIGNLHQLRNSPLLTLQNFAKKYGDVFSISLGHKRIVVVNSVVPAREALVQKSVEFAGRPQDIYTAGKITRGFKDIAFADYGPVWQATRKLAHQSLRLYGSGMERMEDFIQEEADDLCKRIEEAKGKPVNPHQDLALAVINIICSLVFGKRYEKDDPEFLKVVRYNTLITQGFSHTGAAAVLPWLRFFRNKGYEKINTGIAIRDAILREQLNLHKQSFQPDNIRDLTDALLLEVSKEEFKEMNERRYPTDDHIEMILHDAFTAGSETTTTTLRWANLLLVRNPKVQEKAAQEIHNVVGSDKSPRLSDKDKLPYICAVVNETLRISSVIPLGVPHKTTADTTVAGYRIPKDTQILFNNWAI…	Seg1646	42574-44925	42574	499	3
CYP3352F1	MLLEILYAVLLGVLVYILLNYIIHVAQLKRYPPGPIPLPVIGNLHQLGKKPHEALKALSKQYGDVMSISIGNQRVVVVNSIEPAKEALLRSGEDLSGRPQDAYPAYLISRGFQDIGFMDSCPKLRLMRKVAHASLKFYGNGLENLEKSILQEIDDLFERYDAAVGKTFDPYDDIALAVINIICAIIFGHRYKIKDEEFQRVVHHTRLLVQGLDNASAMSFLPWLRFFPNTGLTKLKESVAIRDELLARKVREHKATINPENPRDFTDALINEVTKENMADSMVKTPLTDENLEMILADLFIAGAETTTTTLQWCFAYLVTWPEVQQRIAEERKRVIGDRQPRLSDRGSLPYFESTIQETLRFSSLVPLGVPHKTTRDTKIAQQSIPQGTQIWFNQWALH…	Seg1056	85740-91183	85740	495	2
CYP3352F2	MLLEILYAVLLGVLVYILVNYIIHVAQLKRYPPGPIPLPVIGNLHQLGKKPYEALKALSKKYGDVMSISIGNQRVVVVNSIEPAKGALLRSGEDLSGRPQDAYPAYLISRGFQDIGFMDSCPKLRLMRKVAHASLKFYGNGLENLEKSILQEIDDLFERYDAATGKPYDPYNDIALAVINIICAIVYGHRYKREDEEFQRVVEHTRLIFQGLDSSSPIAFLPWLRFFPNEGLRKLRQGIAIRDELLERKIRDHRETIDPENPRDFTDALINEVTKENGTDSKTKTPLTDQNFELILSNIFIGGAETTTTMLHWCFAYLVTWPEVQQKIAEERKRVIGDRQPRLNDRGCLPYFESMIHETLRFSSLAPLSVPHKATRDTKIGKQSVPQGTQVWFNQWAIH…	Seg1056	93991-96232	93991	495	2
CYP3352F3	MILEAIVTLLLAIVVYIAVKYAIHLSQLKRYPPGPIPLPLIGNLHLLGRKSHLSLKALSKTYGDVMSVSFGTQRVVIINSTQAAREVLLTKGEDTAGRPQDAYPVSLLTNGYQDIVFSDYGPKLKLMRKIAHEALKMYGTGMEHLEECLLIEIGKLFNRLDEVSLGILNIICAIVFGKRYEIEDEEFRTVVEIDHRLAKSADFTGAIMFIPWLRFLPNEQFSCFKKGVAMRDEFLHKKLQEHRETFDENNIRDFTDSLLKQFAKEESEDSKIRKYMDETNLEQIVSDLFLAGSETTTNSLHWALLYFATWPKVQAKIADERKQRIGNRQPRLRDRGNLPYFEATIQEIFRLSSIVLLIPHKTIRETKIDGHAIPKGTQILINLWALHHDEREWDEPTEF…	Seg1056	116945-120001	116945	487	2
CYP3352F4	MLWEAIYTLCLAPLLYVAVKYIISLTELKKYPPGPIPLPLIGNLHLIGMKPYESFKKLARNYGDVMSFSFGSQRIIVINGIHAAREALIQKGEEFAGRPQDIYLAEIYSRGYQNIGFSDYGPAWKLMRKITHSSMKMYGANMEQLEKNVLLEAKELFKRVDKKEGKSFDPKYEISLAVLNVICSIVFGSRYDINDSEFRDVLTYIKLVVQGFDNAAIVSFLPWLRFFPNKGLSMLKEGLRMREVILHKKLKEHKDTFNPNNIRDFTDSLLNEFSKEASEDNKIRKYLTDVNFEQIVSDMFLSGAETTSTTILWCMALLVRYPEVQKKVEKERKERIGNRIPNSKDRGNLPYLEAMIQETLRISSITPLGAPHKAMCDTSVNGHNVPAGTQVLINHWAFH…	Seg1056	105678-110312	105678	503	3
CYP3552G1	MWLIILISCSTVYIAFNIAYHYYQQRYKKLPPGPVPLPIIGNLHLLGTSPHVSMKEISRKYGDIYRIHFGSTPAIVVTHIDIALEGLIQKGVDFAGRPKTYTLDLASGNGKGIAFADYGPMWRLVRKIGHSSLRMYGDGLKNLESLIIKESEELHKRFDRCIGRPINPHHDIALAIMNVICAMIFGSRYDIDDEEFLSIIDSNVTFVRAFEYDNLVDIFPLLRLLPNKRLKMIKQALAIREPVLTKQLKNHRAKFDGETVNDLTDALIKAAQDAIENDKDAKKYLTDDHLYKIMDDMFGAGSETTTTTMRWAFLFFAHWPEVQDKAYETMVNEFGTDRLPVLNDRQSLPYVDAIVHEVLRMACIAPFAVPHKTTCDTSLAGYDIPKDTQIFFNIWSMHF…	Seg3182	22515-11882	22515	506	4
CYP3352H1	MIVEAVLSAVVILSLCLYVKIFTRPKSFPPGPVPLPIIGNMHLLGYRPYLACKEMSRKYGDVFSLFFGGWNVVIVNSIEAARESLIQKSADFAGRPPSIIGGLFARGEKDDRGIDILFADYGPYWRTIRKISHHALKLYGHNRENLEEVIKVHSRQLIERFEEKKGAKFYPRKDLCLTATNVICTLVFGSTYDINDEEFATIVHYTSIVGDSLAGGRSVDFFQWLRYFPIKALKATKEFVRLRDPLILKKIKKHQETFQEGTIRDLTDALLSGAKQEMADDATTVKYLGDDNILMIVNDVFNAAIDTTTTTFDWFIVYSVLYPETQKKLHAQLDSAIGRSRLPNLEDRNTLQYLEAAIHETLRLATVAPFTFAHNTTCDTTLAGYKLPKDTRVFYNLHA…	Seg3669	11574-13709	11574	498	2
CYP3352H3	MIVESILIGGIILLVLLYLHIFIRPKSFPPGPIPLPIIGNIHLLTAQPQKDFQKLSYKYGDVFSLFFGGWRVVIVNSIESAKESLIQKTSDFAGRPPSITGMEAARGQKTGRGIDIVFADYGPYWQTIRKLAHKALKMYGANREKLEKNINVHCGELIERLAAKNGEAFYPRKDLCLVTTNIICTIVTGSKYDINDEEFTTILHMNELAFQGAVGSNGIDFLTWLRHFPNRNLNLIREAVRIRDPILEKWLAEHRETFEKGNIRDFTDALIDAADQEIAENKRSERFLEEDNLCMIMSDIFSAAIETTSTTINWFIVFSVLWPEKQKKIHEELDRVIGRDRIPCMDDRSSMPYLEAAINETARLGSTAPLILPHRTTCDTSLAGYKIPKHTHVIFNLYA…	Seg298	181582-178281	181582	498	2
CYP3352H4	MIVESILIGGIILLVLLYLHIFIRPKSFPPGPIPLPIIGNMHLLTAQPQKDLKALSRKYGDVFSLFFGGWRVVIVNSIEAAKESLIQKSADFAGRPASITGVEGHRGFKTGFGIDILFSDYGPYWQTIRNLAHKALKMYGSNREQLENKINLHSGQLIERLAAKNGEPFNPKRDLCLVTANIICTLVFGSTYDIHDEEFTSIVYYNEILMEGLAGANGVDFLRWLRYFPNKNINLIRESVSIRDPILEKFLTKHRETFKKGNIRDLTDALIDAANEEIAENKTSQRYLQEDNLLMIMHDMFTAATETTSTTINWFIAFSVLWPEKQEKIHQELDRVIGRERIPCMADRGSLPYLEAAINESARLATIAPLIPPHRTTCNTTLAGFKIPKHTHVIFNAYA…	Seg3956	11612-20542	11612	498	2
Partial CYPs
Name	Sequence	Contig	Region on Contig	Start Position	Length (amino acids)	Number of Exons
CYP375E1	NLGLISKRATHIGHEVWIADPADVAAVIRAEPKYPKRFKNPLFDDFYQRHAKDPGVFFLNDAKWQKQKRIISKKMLRPPQINQYIPRINDVATEMITRIYQVRNDAGSDRSFEVDEIDMELFKWSFETVTDFLFDRRFGSLEKNPPPDSVAFIKAVGNFLDNVIAASLVPLKFYKYYKTKAFKAFDENFMLLYQYAEKLIAEKLDDIERREALGENLEDSQELIPFLLSSKQITNDEVGSSIVDTLFAGVDTTSNTMQWMLYLLAKHPDVQNRVREEVMHVFPEGTDPNVANLQCIPLLKATIKETLRLFPVLIVTGRVLPTDIVLSGYHIPANTSMMFLNHSMGRSEELFEDALAFKPERWLRDDSGDLPVDAFASLPFGFGVRMCLGRRLAELELQI…	Seg298	97071-98394	97071	440	1
CYP375E2	NLGLISKRATHIGHEVWIANPADVAAVIRAEPKYPKRFKNPLFDDFYQRHAKDPGVFFLNDAKWQKQKRIISKKMLRPPQINQYIPRINDVATEMITRIYQVRNDAGSDRSFEVDEIDMELFKWSFETVTDFLFDRRFGSLEKNPPPDSVAFIKAVGNFLDNVIAASLVPLKFYKYYKTKAFKAFDENFMLLYQYAEKLIAEKLDDIERREALGENLEDSQELIPFLLSSKQITNDEVGSSIVDTLFAGVDTTSNTMQWMLYLLAKHPDVQNRVREEVMHVFPEGTDPNVANLQCIPLLKATIKETLRLFPVLIVTGRILPTDIVLSGYHIPANTSMMFLNHSMGRSEELFEDALAFKPERWLRDDSGDLPVDAFASLPFGFGVRMCLGRRLAELELQI…	Seg1568	89571-88428	89571	440	1
CYP3336B2	ISNLGGPFEELIQDKFTHLTLDVIGESAFGYSFNSILEGNSKESMATDTILRGGFNLQRRALESWFPFLKYIPSEEREKVDEATNVMNGIIDKVIKDRREEMASGENPERTDLLQSLLKMKDDAGDSFTDEDLNAQVRMFMIAGSTSLSWSILLLSKHPEFQERVRDEIRSILKDEEEITGDHLQKMKFLDNCIKESMRLYPVALQIGRETKEDVKIGPYEIPKRTMIAVAVASAHRDLEFWDDADVFNPDRYDQPEPDSTTKLYRYFPFSRGPRMCIGYRFAEAELKLVLAQILREFSFRLGKNQSPDFKAELVLALRPSPSPMVEISTAA	Seg1077	305347-301791	305347	332	3
CYP3336B3	ELIQDKFTHLTLDVIGESAFGYSFNSILKGNSKESMATDTILRGGFNLQRRALESWFPFLKYIPSEEREKVDEATNVMNGIIDKVIKDRREEMASGENPERTDLLQSLLKMKDDAGDSFRDEDLNAQVRMFMIAGSTSLSWSILLLSKHPEFQERARDEIRSILKDEEEITGDHLQKMKFLDNCIKESMRLYPVALQIGRETKEDVKIGPYEIPKRTMIAVAVASAHRDLEFWDDADVFNPDRYDQPEPDSTTKLYRYFPFSRGPRMCIGYRFAEAELKLVLAQILREFSFRLGKNQSPDFKAELVLALRPSPSPMVEISTAA	Seg5230	8068-4497	8068	323	3
CYP3341A4	MEVILSTAFGVKTESQTNPDDHLMKLARAAMQRRLVVTLAVMIPVIGQWLSRKLAASRFGLGNSELFDIARGIIKERRQIAAESGYHRKDMLNLMLAAQDPEDKGYKLTENEILAQMVLFILAGYDTSSSVLGLTCYSLAIYPEIQERVYEEIKGVCSSPDTCTYDEISQNQMPYLDACISETLRMYPPGFIGTRHCNESCSINGVEFKKGMAVIVPIYNLHHDETYFPDPESYMPERFLPGNKESIKPFAYLPFGMGPRNCIGMRLALMEMKVVLVRMLQKYRLVRCPETRVPITIKPKAVLSPAEPVMIQVEKRN	Seg298	35848-38324	35848	228	2
CYP3341A5	DMLNLMLAAQDPEDKGYKLTENEILAQMVLFILAGYDTSSSVLGLTCYSLAIYPEIQERVYEEIKGVCSSPDTCTYDEISQSQMPYLDACISETLRMYPPGFIGTRHCNESCSINGVEFKKGMAVIVPIYNLHHDETYFPDPESYMPERFLTGNKESINPFAYLPFGMGPRNCIGMRLALMEMKVVLVRMLQKYRLVRCPETRVPITIKPKAVLSPAEPVMIQVE	Seg6750	1529-1	1529	225	2
CYP3341A6	DMLNLMLAAQDPENKGHKLTDNEMIAQMVLFILAGYESTSNTLALTCYNLTIFPELQERVLKEIKDVCSSQDTCTYDEINQMPYLDACISETLRLYPPAVVTARNCLESCTINGVNFKKGVAVLIPIYSLHHDAAYFPEPEAFKPERFLPENKESINQFAYMPFGMGPRNCIGMRLALMEVKLVLVRILQQYRLVRCPETPALPLTLVQRTTLCPKEPVMIQAKKRN	Seg6750	18917-20163	18917	227	2
CYP3341A7	DMLNLMLAAQDPDKSGRKLTEQEVVSQMIVFIMAGYDTSSNILGLTCYHLAIYPEIQEKVFEEIQDVCSLPDTCTYDEINKMPYLEACISETLRLYPPGFITAREVTEACTINGIYFRKGMSVFIPIHAMHHDEAYFPDPETYKPERFLPENKGSIDPYTYLPFGMGPRNCIGMRMALLEMRVILVRMLQKYRLVRGPETHVPISVKPRSVLSPSEPVMIRAEKRD	Seg5117	2549-4959	2549	226	2
CYP3341A8	DLLNLMLAAQDPDNYGHKMTEQEVVAQMIAFILVGYDTSSNVLALTCYHLAIYPEIQEKVFEEIKDVCSLPDTCTYDEIHQMPYLEACISETLRLYPPGFITARKVTESCTIKGIFFKKGLSVLFPIYALHHDEEFFPDPESFKPERFLPENKGSINQNAYMPFGMGPRNCIGLRFAMLEMKVILARILQKCRLVRGPETPFPIKVKPKYVLSPPEPVMIRAGKRD	Seg644	63029-65066	63029	226	2
CYP3350B2	YSINSKFYLIHCQINSLKKPNFNXFLTGTETTGTALKWAILYLSLWPDKQEKAHKSLECLQGELPKYSDRKILPYIEATMSEVLRMGSLAPLSVPHKATVDTELCGYHIPKGTILMMNAYSMHHDPAYWNEPDQFAPERFIHPDGHYFIPNSSYMPFSVGKRVCLGETLAKREMFLFLCYLLKHFRFEKVDNEEVYLDGKFGATLTPKPFRVKVLKRDCL	Seg1840	179111-178449	179111	220	1
CYP3351A2	LAVLNIIRQMAFGTRFSEEDPEFKKNLQYINTIASSFDIVGNAMDCFPFLKLFPFGKIKSLKDAMKTRDEIMSEQLKRHQENGLKLHDFTTFLLNSNDTGKSGENALSDTQLKLLMFDLFGAGVDTTIVALLWAIIYLIRWPECQRKIQTEIDELKPECTEVTIADMKDFHYTQAAVCETLRMCSLFPISPRKATRNTTLEGYDVPKGTDVCFNLWGINHDERHWKYPEVFMPERFLRSDGKLKTLRHLSFAPFSIGRRRCPGENIARNEIFLILCTLMQHFDIKPASELPSLDSVPTVSVKPKPFECIFLARKKN	Seg9884	1521-2473	1521	316	1
CYP3352F5	LAVLNVICSIVFGSRYNINDSEFRDVLTYIKLVVQGFDNAAIVSFLPWLRFFPNKGLSMLKEGLRMREVILHKKLKEHKDTFNPNNIRDFTDSLLNEFSKEASEDNKIRKYLTDVNFEQIVSDMFLSGAETTSTTILWCMALLVRYPEVQKKVEKERKERIGNRIPNSKDRGNLPYLEAMIQETLRISSITPLGAPHKAMCDTSVNGHNVPAGTQVLINHWAFHHDEREWDQPEVFKPERFLDVNGNFIHGLKKSYLPFGAGRRVCIGEALGKLELFLFLSNILYRYEILPAPGEEMPDLEGVLGAVLSVRPYKIQMKRRPDTLEINI	Seg92	116261-117249	116261	328	1
CYP3352H2	LVTTNTICTVVFGSKYDINDEELTTIIYYNKIMFEGLAGANGVDFLTWLRHFPNKNINLLRESASLRDPILEKWLAKHRETFEKGKIRDFTDALIDAANEEIAENKTSQRYLEQDNLIMIMADVFNAAIETTSTTMSWFIVFSVLWPEKQKKIQEELDKVIGRDRMPCMEDRPSLPYFEAAINETARLASVAPLGVPHRTTCDTTLAGFKIPKHTHVFYNQYAIHHDERHWKDAEQFQPERWLDENGNYTPGAHSSFLPFSAGKRVCFGESLAKMELFLILSQAFQRFSFSPAEGEELPSMDGFVFLTHEPKPYKVVAKKRF	Seg2695	33437-32469	33437	322	1
CYP3352H6	MIVETILLGGITLALLLYLRIFIRPKSFPPGPIALPIIGNIHLLSTQPQKDLKKLSKKYGDVFSLFFGGWRVVVVNNIEAAKESLIQKSSDYAGRPPSITGSETARGKKTGRGIDIVFSDYGPYWQTIRKLAHKALKMYGANREQLEKTIHVHSAELIERLTDKEGEPFDPKRDLCLVTTNTICTIVFGSKYDINDEELTTIIYYNKIMFEGLAGANGVDFLTWLRHFPNKNINLLRESASLRDPILEKWLAKHRETFEKGKIRDFTDALIDAANEEIAENKTSQRYLEQDNLIMIMADVFNAAIETTSTTMSWFIVFSVLWPEKQKKIQEELDKVIGRDRMPCMEDRPSLPYFEAAINETARLASVAPLGVPHRTTCDTTLAGFKIPKHTHVFYNQYA…	Seg2697	11681-5619	11681	498	2
CYP3352H5	LVTANIICTLVFGSTYDIHDEEFTSIVYYNEILMEGLAGANGVDFLRWLRYFPNKNINLIRESVSIRDPILEKFLTKHRETFQKGNIRDLTDALIDAANEEIAENKTSQRYLQEDNLLMIMHDMFTAATETTSTTINWCIAFSVLWPEKQEKIHQELDRVIGRERIPRMADRGSLPYLEATINESARLAAITPLIPPHRTTCNTTLAGFKIPKHTHVIFNTYAIHHDERHWSDPEDFQPERWLDEDGSYTPGKHTSFLPFSAGKRVCFGEALAKMELFLILSRVFQSFEFLPADREDLPKTDGFVFLTHQRKPYKVIAKKRF	Seg298	191262-192232	191262	322	1
Total number Genes	37
Full length Genes	22
Partial Genes	15

## Sheet: Nematostella vectensis
Nematostella vectensis
Complete CYPs
Name	Sequence
CYP3662A2	MYWLLAIAVLLVLLYWNGVKNYSILKNEPLKGPEPWPYIGNLLEVGKYGGLHKMQLHFSKIYGRVYKLFIGRAPTIVVSDPEIIKQILLKEFNKFPDRPAFIKFGRPFNSGLFIASGETWKRIRSTLTPSFTSGKLKKIVPIFNTASDNLSAKIEKLADSGESVDCIRLFSLFALEVIMSAAFGYHADVQTAPDEEFVAKARNVFAIPAWRRFFSMIPFADFFGRFMTPMNFGHYFLQMAEGMVNNRIAEGGRGRNDFIQLMLDAQAQTIEGVPKLTPDQIAAQSVTFLIAGFETTGTTMSNTAYFLATHPDIQEKLVQELDEARENRGDMSLYDLAQNTEYLDKVLNEVLRLCPPGFSLARRCAEECTIEGVHFPKNVDVNIPVYVLHRDPDLWENPE…
CYP3662A3	MLWLVILLPVLAAVYWYGVSRYSILANEPSRGPNPWPYIGNLLDVNKHGGMHKMLMHYFKAYGRVHKMFIGRAPAIVVSDPEIVKQIVIKEFHKFPNRPLFIKPNPPMDSGMFLGQGALWKRIRTTLTPTFSTAKLKQIVPIIDSRKWPLSPQQVERSESTDCVNLFSLFALDVITISAFGVETDIQTDPDSSFYKLAKKAFRTPIWVRAFSMFPFSEYLSKYVHVLPNIDYFLKIALSMVEQRKKHGSQGRKKDLVTLMLEAREDTVDGVPRLNDQELAAQSLTFLLAGFETTTNTLANTAYLLARHPDVQDKLIQELDLAGSNRGNSPLYEYSQKIDYLDRVINESLRLYPPGYLIIRRYDEECTIQGVHFPRGVDVNIPVYILHRDPAVWERPDDF…
CYP3662B1	MECDTEFQYIARNQWTVLIAVIVVVFWSYIYFAWPSDLPLPGPKPWPFPISAIIYSRAVKRLGGTHGLQFEYFKKYGRVYKMYSSGRIPTICVMEPEMIKQIMVKDFMKFRNRGLPLTLPPPLDSEMFLAKYPKWKRVRKVIAPAFSGSKLKGTVGLIEGAAERMNAKLESYSQTGKIVEMTDLFSLCILDVILSSAFGVDTSDFQTSSDHTLLNKAKVIFNRPFLIAIIGVLPFANFLSRFVDVVGNAGFFMDLGWNIIQQRERQKSSDRYDVVQIMIEANQTVIDGESKLNENEMRATCLSFLAAGYETTATTLINASYFLATNNHVQEKLAEEIKSALEKDGNMSTYDFVHSIDYLDWVIKEVLRLCPPGHRHLRECEEECVINGVTFPKGVYVQI…
CYP4KZ2	MAAIEAALVFGSIIILLFLLVNHRARRVREMHKFQSPPPYRMLFGNTLEFKDEPSEFLEQIMGWCSQFKGIFCLWLSFAKPFLLIYEPKTVEVILSSSKHITKAQFYDFLLPWLGTGLLTSTGEKWKKRRRLITPTFHFKILNDFVQVFDQQSQLMVSIIKSQPSDKVFNIFPLIACCALDIIGKTAMGVNINAQKNSSSEYVKGVIRMSELIQSRQKRPWVHPAFLYCLTNEGREHNKIIKFLHDFTNQVITERIQERLYSPKEQDETEESDEFTGRRKRRLVAFLDMLLNAYDAGEIDVEGVREEVDIFMFEGHDTTAAAMAWAVQLLGEHPDVQRKAQAEVDEFFATNSGKLTADSLKGLKYLECVIKETLRIFPSVPFFGRSLVEDLELEGRLIP…
CYP16D1	MSSLPGHIGWPVTGDKTIEFSKNPTQFVKGRITEYESRIFQTRILNKPHVFVASSQGVKEVLQDHSYAFTMGYKDFGYMYSLYGDLLLFNDSDEATRLKRILCSVLQPHQMAQCLAEVDTICSRVLVNLHTEPVSLYKTFKTVTTQICLTLFLGLDFEEAQTEAGQIVDLTIQHWNGLISLPVYFNVYGQKSGYSKAMLAKNRLLEVINKQLLEVADLDGTIIGTLKEAGFVSRSELANHLLLFVSALVPKALASLLTSFCLELAKPRNNGMQERAAKDDLFLDDALLEVQRLWPPFLGGRRIARQDVVIDGYRIPSGYHVAYLTKASNTDPSIFPGPNHFDPKRWRTSTGDDCDRVWTFGAGPRKCVGHAFNNKIIKFVMRYLLRYYKWSLPEDQDLT…
CYP46B1	MGVFLIIFGAFATVVGFASLVFLLVSLYLFLLHKKYDHLPGPERASFFFGHIPLIKENIMKGRELQELSNRYDGVYVSWFGGWHPSVTLSHPDALREAIIKYNLPKPVKFYQSMSEMFGVRFMKDGLVTIPYHEVWKKKRMPLIQLSFAREHLKTLISSFNQSCDLFIETLKPLADGKTEVCMLDQFHRITMDVIMKVAFSLDLKTLDDKDSTFPKAVNKMLEAVMFRFRNPWHKYDPRTFKYQREVANSLRMIRETGRNCIAERQAAIVQGEEIPNDILSTIMKLELQGLELDIEELLDDFVTFFIAGQETTANQLSFALLEIGLHPDITHKVVEEVDKVIGSHVDFVEYDDLANLSYMTQVLKETLRKYPPAAGVIRHSPEEITLNGHVIPAGTGIG…
CYP46D1	MIPFIEEYVSLQAFAIISLGLLSTPLTGFLAYCLYLFYVHCQYAHIPGPKRDSFFAGNVPSIQYEINVKKRGICELWSEWYNQFGGAHIFWVYHVPVLVLGHPDDVKKVLVTWNLPKASRLYKTISYCYGERFAGEGVLTELDHEVWKRKRALLNHAFHRKYLRNLMQAFNESSNEFLKRIGSLADGKTEVRMADEFAKVTLDVIGKVGFNIDVNSIGDENSPFPSAITTALDGLQKGMRNPFWKFKFWTFSYQEKVKSAIRFLRKFGQSVIMERNTAIIEGLESPKDILAHILQMGKENADYTLENMTDDFITFFVAGQETTSNQLSFTLMEILGDSSIENKICNEVDDVLGSRQYVEYQDLGKLEYVGMTLKEGLRLHPPITGTQRILPFRETLGGY…
CYP46E1	MSVLSCVLTALILLSVILLFALLIYALYILYVRRKYKEIPGPPVERFFSGHVPIFNQGRLRGLNFYQILWEISQEYSPVILLWYYHIPFVALCGHELTRQALLELDLPKAEQVYQSLKFVFGQRAARDGILTECDPEIWKRKRGMLSPAFHRLWFKDSMGMFNAVCDKFLVKLEGYASSGEAVDLSEMFSRVTMDVIGKVGFNNDLRATDNDKCEFRAAAYTCLKGMQENMQDVLWQFNVLKYPLHHKARHAAIFLREFAARVIAERRNALRKGETTPKDILAHILRMSDGDKPIADEEMIDNFLTLFIAGQETTANQLAFTVYEIGKHPQIEMRIQDEVERVLGGKSRVDYEDLNLLKYVNQTLKESLRLHPPISGLSRMTTKDITLNDVIIPKDTCV…
CYP375A1	MGRRFLERHTQNIERYGKLYKREAQSTIVYVADVNDAEKILRYEAKYPHRIEDPVISHYMAKRQAIPGVFFSNGNLWYKHRRAISKKLLVPRMVEQYVPTYNAIVDDFLARLSFIKGPEGSSYENEVSNLQDELFRFAFESVGFLLFDKRFGLVDGGEDMRPEVALFAKSLDGFLRNIVGVSDLPLWFYKLYETRTYKDVMRSLDGMYHCANVFVDERIKEMEQEEICKDFEKDVTRLDFFTFLLLRGNLKKEDLLASVIDLIFAGSDTTANTFQWALYLMGKNPKKQEKLHKEVRSVLGANDCPTSQHISNMPYVTAWLKETLRMYGTVPFVTRKLPVEITLQGYKIPAWTSFVILTSVISRDKDNFDEPLVFRPERWLRDDTGQKRETFNALASLPF…
CYP375B2	MASFSSPCFRASARQYLGLFRYPASCRAIYHRHQTNSTYSATPSGERVKTIAEMPGLPSLPVFGSAPFLALNRKGRPLGRFILDKQFTDVETYGKIFKLDVPGGFKIISVADPDTAMAILRNEPKYPKRFDSPLLDFYRNTRKKIPGVFFAEGPDWHKYRSVISKRILRPKEVADYVPEFDNIGSKFLERVENIRGKAGTDSEYEVENLDNELFKWSFESVAYMLFDKRFGTLEENVNPDAQGFIASVGGLLESILPASLLPVFIYKVYETEAYKNLVYHFDRMYNYAEKFIGERVQELEKEGKLDGDIQDGERVDFFRFLLSSGKLTRDDLLASVIDLLFAGVDTTSNTMQWVFYTMGKHQDKQEKLYQEIISVLQPGELPSTKHIAKMPYLRAWLKE…
CYP375D2	MHLRQQEWRQNHGPIYREQFGPYKTAFVADPKLVREVFRNEGKYPQREPQIELWMDYKEKRKQAHGVFSSLGEEWFKARSVLNKKMLKPKVVDGYAPELSNVVDDFIGRVNELRSTTSDKTVPNLQNELFKWSTESIGTVLYEKRFGAFSQSGAVESQSIITAVQNLLAGFIKIFFMPVWVTKFYETKAVKRFYQSMDTLYDFTDKCVEEKLKDINERSVDADENSEAEFLTFLVASKSLSLSEITSNLVEILMAAVDTTSNTSLWACYCLAKHPEVQEKLHKEVTSVLEPGEVATPATLNKMRYLRSVIKETLRLYPAAPENARFMQKDTEIGGYLIPQGTMVRIPLYVMGRDPEIFDDPLTFSPERWMRGDDTHPDYHAYAMLPFGHGTRMCLGRRV…
CYP377A1	MSEKDGFKKMFRVQKKLFDEYGPIYKENLFGRTSVNILYPAESEKVFRAEGKYPSRPYVKAWKKYREDRGIHAGIAQTEGKEWKRVRQALAPKMMRPRELHDNIENFYEVVDDAMSRLQNARQGRTEGEVDNLEEHLFYWATESIGTMAFDTRIGLYEDPPKEDPKRFIECVHEFFEMTQNLELSMEKSFFEFMDTPSYKKFCRAQDDVMRIGQKYIDMKMVELEEMAKSPEEMLEEKAVPILTYMLAKKELSPHEINISAIEMFMAGVDTTSNTMVWLLYNLARNPDAQEKLYQEINSVIGKDGYLTVSDLGKIPYTRAALRESMRLNPVIFMNVRQLNKDIVLSGYHVPAGTLIQMPIYSACYSEQLFHNPTEYKPDRWLRDGGDDIHAFAHLPFGF…
CYP377B1	MDIRPFQEIPGPKGLPWIGSIHGYILKGGVSKLHLLHQSYFKKYGPIYKDHLMGTTTVSISDPEDIAKVFRNEGKYPERTADLGALQKHREKTNQPPGVAYAEGQEWLRLRTAFGKKMLRPKELAKHVVGFSGVANDAMQSIKGARDGKMEVEELELQLQKYTIESIGTLVYGFRVGIYDSPPRKESKEVLDAVRIFFPNLFKQMTSFDRILTRFYEPASYKAMCESHDNFMKHSDTFLRESIERSRGSKKEADDNEEHLASEGLSMKEINLAAIDMFVAGVDTTATTLQWLLYNIARHPEVQERLHDEITFVTDGCGSLSAKSLGRIPYTRACLKESMRFNPPAPAHLRRLKEDTVLNGFHVSKGTIVQMSVYSNAFDDKLFKNPTEFKPERWFRDTG…
CYP3094A1	MIALVAVLILIAIASLTSLHIWRQDKNAPPGPPLYPFVGNFPQIGPVLHKSLTSLGKQYGRGVFQVQLLGKRFVIIDNIKLARQVLLKKNGRDVADRTSAYVIDAISRNGCSVIFGKYSPTWKLQRRVVHSALRMYGSGVRILEALILQEVDNLCDIFANSQGAPVDTKLPLTLSVMNVICALVFGKRYGLDDAEFTDIVATTESMAKLASPENPLIYMPWLRFFPLQVVKKMKETVTARDRLIQRKITEHRETYKEGEIRDLTDALLKSLEDAKQEDNNAMSLLTEDHLLIAINDVFMAGFETTTTALRWIFLYVAAYPEVQARIHQELDDVISFGRDPLIADRKSLPYLEATILEVLRISPVFPLIRRKARKQLNIGGYCIPEETFVYVNLWAIHHD…
CYP3094C1	MVSFVGAHYFYLQIQIEFTKAAKQYGDVFMLCLPGERTVVISSASIARDAVLTKKDDFSGRPYKFTWDYLTRGSRDIAIGDFSPSLILQRKIVHSAMRSYMSRLESTVIREVDELTKRLRSHHSKPMDPGHDFFLTTLNVICAIVYGQRYEIDDPEFLRIVDYNEKMFRLLAAVNLLNTLPFLAKLPIKDSRDLEYVRITRDELLDRKLNEHRETYEEGNIRDLTDALIKALEEAKKEDSKVKDLITQDHVVLTMADAFSGGLETTTSTLRWFFVYMMSNPEVQARVHAELDDVIGRDVMPRWEDKDRLPYLEAVIAETLRLSSVVALAVPHKTIQDTTLEGYDIPKGTTVLLNIWAMHHNETEWTCPLKFDPSRFLDSDGNFSAGSGSRSYLPFGAGR…
CYP3094C2	MPPGPRPLPILGNLLQVAPWMLKKQLQVELTRASKQYGSVFTLDIPGQRTIIVNSAPITRQALQANKDDFAGRPYQFTLDYLTRGSKDIGIGDFSPTWVLQRKIVHSAFRMYNPILGGKVKKEVEELSKRFRSYKGIPIDPTKDVFLATMNVICAMVFGGRYEIDDPEFLMIVEYNQKMFPLFLPLSPLNICPLLINVPIKDSRTIRWVRKTRDAFLDRKFLEHQETYQEGTIRDLTDALIKALQDAVKEDSKIHGQITQDHVVMTMADAFSVGFETTTHTILWFIVFMIHNPHVQARCQSELDDVIGRDVTPGWDDKDRLPYIEATIAETLRASSVAALSVPHKAIKDTTLADYKVPKGTSVLFNFWAMHYDDKEWKSPEVFDPTRFLDSDGQFIHAG…
CYP3094D1	MATPTNLPDGPKPLPLIGNLHNIAGSEIHLAVTKLVKDYGDVFTLRILGESIVFINSGAAAKEAMLGKHMDDFAGRPKKFTFDYITRNCQDIILGDYSRALNWRRKVFHSALRMYAPRFDNIIREQIVAFESRMDASEGLPVDSRDEFALLILNIICSFVCGKTYSLDDPEFKKIKQFNIYSAEVPVATCILNIFPWLIHFPLKSSRLFKGFRNTRDEVLDKIFLAHKETFQEGNIRDLADALLQAKIEIEREDKKAVGMVTDDHVIMMLSDIFGGGLESTISSLRWCVAFLIYHPEVQARAQAELDDVIGEKFPTLADREKLPYIEAVIAETLRMGSNVPLAIPHKAIRDTAFRERAIPKGTTVLLNLWAIHRDPKEWSNPEEFYPGRFINSNGEFEV…
CYP3094E1	MPPGPTPLPLIGNLLSIKSSNIHFELANLAKTHGDIMMIELFGMKIVVVTSGPLAREVLMGKHINDFAGRPKRFTFEYMSKGYKDIALNDYSPGLVWKRKIVHSGLRKYFPSLGDTIAKELAKLEDKLNSDVGVPVDSKDEFFLLVLNIICSFLSGKAFDKEDPEFSETLELVTKTVDTLSMSASILDAFPFLIHFPLQASKNFKRIAELRDKLMGNILTFHKETFNENHIRDLTDAFLKAKLDIEREDKKAAGEVTDEEVALMMMDVYLAGLETTVTSLRWIIAYLMNNQEVQSRVQSRIDDVIGDRRPLMSDRQGLPYMEALVAEVLRLSPPIPLGLPHKSILDTTIDGYTIPKGTTVLFNLWAIHHDPREWPEPDKFDPDRFINEDGKFEVPGDRN…
CYP3094E4	MPPGPTPLPLIGNLLSIKSSNIHFELANLAKTHGDIMMIELFGMKIVVVTSGPLAREVLMGKHINDFAGRPKRFTFEYMSKGYKDIALNDYSPGLVWKRKIVHSGLRKYFPSLGDTIAKELAKLEDKLNSDVGVPVDSKDEFFLLVLNIICSFLTGKAFDKEDPEFSETLEFVTMTVDTISMSASILDAFPFLIHFPLQASKNFKRIAELRDKLMGNILTFHKETFNENHIRDLTDAFLKAKLDIEREDKKAAEEVTDEEVALMMMDVYLAGLETTVTSLRWIIAYLMNNQEVQSRVQSRIDDVIGDRRPLMSDRQGLPYMEALVAEVLRLSPPIPLGLPHKSILDTTIDGYTIPKGTTVLFNLWAIHHDPREWPEPDKFDPDRFINEDGKFEVPGDRN…
CYP3094E2	MLVEGFLLVATLTLLYYLYDYVTSPANLPPGPIPLPIINNLLSITGSDSHLAAAKLANTYGDIFTLKIFNDRFVFVSSGAGAREVLMGKRMNDLAGRPQTFTFNFLTRGAKDIIFGDYSRHLVWRRKIVHSGLRMYFPKLEENIAWEVSKLERKLMKDVGTALHSRDEFSLLITNIISSFLLGKSFEPDDPDFLTTLEFTRIGSQLPVSGSILDNFPFLVHLPISESRFYKKLVEIRDRLLDKFFLEHKSTFSEDCIRDLTDAFLKAKLEVEREDKKAIGEVTDDHITMLMTDVYFAGLETTSTTLSWLAAYLINYPQVQTRLQTDIDDVIGSRWPVLADKPNLPYMEATIAEVLRIATVAPMGLPHKATTNNVPLMGYNIPKDTIIVMNLWAIHHDPR…
CYP3094E3	MLVEGLLLVATLTLLYYLYDYVTSPANLPPGPIPLPIINNLLSITGSDSHIAAAKLAKTYGDIFMLKIFNDRFVFVSSGAGAREVLMGKRMNDLAGRPQTFTFNLLSRGAKDIVLGDYSRHLVWRRKIVHLGLRMYFPKLEENIAWEVSKLEGKLMEDIGAAIHSKEVFLLLITNIISSFLLGKSYEPDDPDFLTTLEFIRIGSQVPVSGSILDKFPFLYHLPISESRFYKNVVEPRDRLLDKFFLEHKSTFSEDCIRDLTDAFLKAKLEVEREDKKAIGEVTDDHITMLMTDVYVGGLETTSTTLSWLAAYLINYPLVQTRLQTDIDDFIGSRWPVLADKPNLPYMEATIAEVLRIATVLPMGVPHKATTNNVPLMGYNIPKDTIIVMNLWAIHHDPR…
CYP3094F2	MIAEVILLIVTLVLLHHLFHRYTEPSNLPPGPRPYPLIGNLPQVVGSFSSLHVKFTELAKAYGSVYTLYLNGQRSVVVGSAKALHEGLVERKDAIAGRPYSFSMEYGCKGCKNVGFADFSPLYLFKRRVVHSSLRQYYPQVEDNVNHQLDDVLTRIKALDGTAFDPHYLLSLVSLNLMSSITFGTNYTLDDPEFLRLVQMNDAFGQCFGAFNILDMFPFLLHFPIKASKLLKYLATDRYDFLMEKARKHEINYDGKTIRDLTDGFIKALSEAEKDGSEIHSLIDTDHVAMTMGDMVFAGSETSATTMRWMLAYLTVYPEVQARLHQQLDDVIGRDKNTIITLNDRDRLPYVEAVIAETLRVSPPGPFLLPHKATCDTTLDGYLIPKDTTVIFNLWKIQN…
CYP3094F3	MIAEVILLIVTLVLLHHLFHRYTEPSNLPPGPRPYPLIGNLPLLIGSFSSLHVKLTELAKTYGSVYTLYLNGQRSVVVCSAKAAREGLVERKGAIAGRPYSFCRDYARIVQSSMRQYFPQVEDKVNHHLGEVLARIKMLDGTAFDPHYLLNLVTLNVVSSITFGTDYKFEDPEFQHVLRLNDAVGRSFKAFNILDVFPFLIHLPFSASKDLKCVCAERGKYAMDKARRHVDSYDSDRIRDLTDGFIKGLAEAVKEDDKVESFFTTEHVAMVMSEMTIAGSETASTTMRWMLAYLAVYPEVQARLHQQLDDVIGRNKNKIITLKDRDRLPYVEAVIAETLRISTPGPLAIPHKATCDTTINGYFIPKDTTVIFNLWGVHHDPAEWADPHVFNPARFLNKD…
CYP3094F5	MIAEVLLLIVTLVLLHHLFHRYTEPSNLPPGPRPYPLIGNTPLLIGSFSSLHVKLTELAKIYGSVYTLYLNGQRSVIVCSAKAAREGLVERKDAIAGRPYSFTLDYVTNGSKNITFSDFCPTFLLKKRIAQSSMRRYYPQVEDKVNNQLEEVLARIKALDGTAFDPHHLLSLVTLNLVTSMTFGTNYTLDDPEFLLLVQMIDDSTRSIGSMSTLDMFPFLMHLPIRTSKLLKSITKTVNEYFMKQVQRHIDSNDGKSIRDLTDGYIKGLTEAEKEDASVHEVNSIEHIAMVMADMIVPGSETSSTTMGWMIAYLAVYPEVQARLHQQLDDVIGRDKNTVITLKDRDRLPYVEAVIAETMRISTAVPLAIPHKATCDTTINGYFIPKDTTVIFNLWGVHL…
CYP3094G1	MRKKQDANLPPGPPPLPLLGNMLDIWGSMPNIHLGFSKLAKHYGDIYTLYLQGNRVVVVGSAAIAREALVLRKDDFSGRPYSFIGDFFTRGCKDLAMADLSPTLKWQRKLVHTALRLYSPRLEGQVCEEVDGLIKRLKAANGNPIDPKHDLFLTILNVICNMVFGSCYSMNDPEFLQVVHYNQLGFRLLSPVSLVNIFPWLLKLPTQQARDFYYVRDVQGKILDQKFSQHKATFNSSNIRDFTDALLKARLEAVQENEAVHHMITEDHLIMTIADVFSAGAETMTTTLRWFIACLVNFPDVQKKIQNELDCVVGRHRLPTLEDRERLDYLEAVITEVHRYCTVTHLSLPHKATCDSHLHGYSIPKDTVIMFNVWQMHHDERYWDQPYRFDPTRFLDAKG…
CYP3094J2	MLQMGPTPHLGLTELAKSYGEVFRLKVGSHRIVVVNSIEAAREALVRRANDFAGRPMLYTASLISRNGTDIAFGDFGPLWKQQRKIAHSALRMFGSGLKPLEEKITVEADELIKRLSLVEGRAHNPKDDVNLAVLNIICSFVFGSRYDMDDPEFHTVVDYTEQFVQGFRAASLVDYFPWLRHLPNKGLRQIKEACQNRDVVLQKKYQEHLVTYEHGVIRDLTDALLSANKASQEESAYLPMTEDHIIMTMNDIFSAGLETTATSILWSLVYLIRNPKVQEQLHQQIDEVVGRDRAPELSDRENLPLIEATIAEVLRSSSLVPLLFPHSTTTDTHLRGYEVPKDTIVLFNVWNMHHDPQRWSNPDEFDPTRFLDDKGKFICPATLSYLPFSAGRRVCLAE…
CYP3339B1	MQILDSGIVPNVYFLAGTLILLIVLAVIYWVGVSSFRVLKGLNIPGPTPLPYIGNLRDIQRLGGIHVAPVRLMQEYGKVFAWSVGRTPAIVVGDPEILKHVMVKEFQNFRNRFLLFRDTRSEMLHGMFSATDDKWKRIRSTLTPTFTSGKLRQMNPKIRESCDTLMDKIGKVADTGESVDILGMFCQMTLEVILSTAFGIDSEVQKNPNNTFSDKAKEIFKSPTFLRMFLMLPFASVFFKIFRFLIHNNNMKYFIDLSKEILSKRHDKTFNRKDFVDLMLSAVNPDGSRKLSDPEIIAQSVTFLLAGHETSSNALSATAYYLALNPEVQERLRLEIRMAAETNSDKSPHELANDLEYLDCVVNEVLRLHPPVHTMNRECAQACVINGITIPAGMDVTIP…
CYP3340A2	MAVSLEFYQIFTLCNSLVLACVLLIATIVWKIGFAPFYFLKNLGIPGPKPWPFIGNLPILYEKKHDTYAQEYLVKTYGRLCGYYMGTRAAILVADPEMAKQILVKEFDKFVNRPIVQSAQTPPTDKTLLSLQDDDWRRLRHTITPTFSAVKLKQVLPLINESCRILVEKLGEACKDGKSVDVLRSYGKFTMETIVTTAFGIDCQTQTNPNDQFVPNAQRLFGGQSLFRMLAVLFPYLQPIVSLMVKQLGLGKQTETGKSAMFIVDAARQIIKHRRETGSQGRKDLLEILLSAETTDDDGRRKNKLSDDEIVAQCFTFILAGYETTSNTMAFTSYLLALNPDKQDRLIEEIDEVAATVGDNFDYDTVLGMEYLEMVVQEALRLYPPGFRFGRTCNQSCTI…
CYP3342A3	MIATTGDLPGPTALPFIAHLHDLIRHKGQILKQFQEYRKKYGRLYAMFLVGKKPCVVVADPEIVKHIMVKEFSSFRDRPSFVMEQPEPFDSMMTSAKYEKWHRIRNTLSPAFSAHKMKLMVPLINSSCDVLINKLTKVAESGESFFTHKFHQGLTMDTILKTAFGIQSEAQTNYDDPAFKAARKSLSTSTTRRVIVTLLFLMPFKNYIFKAFPSLVIGNFEGLLEMTKMIVEVKKSNLHNEAKDMLDLMLSAAANENTSKKLSDMEVLAQSLIFLIAGYETTNITLSFVAYSLATNPEVQEKLQREIDSVWTEEDEMPSYDTVHNLPYLDMVISETLRLYPPGFVASRECTQDCVIKGYRFRKGLPIFIDAYSMHHDPEFWTDPERFDPERFSSEANQS…
CYP3342A4	MAILASVIAFVSTNALSLVLALIICAILYAYFVYPYLRSTMIAATGDLPGPTALPFIAHLHDLIRHKGQMQNQFQEYYKKYGRLYAMFLVGKKPSVIVGDPDIVKNIMVKEFSSFQDRPVEPFNSFMTRAKYDKWHRIRTSLSPAFSAHKMKLMVPLINSSCDVLINKLTKIADSGTSFFVHKFHQGLTMDTILKTAFGIHSEAQTNYDDPAFTAARKSMSTSPARRVMLFLIFLMPFRKYIFRWFPSLLIGNFDDIMKITTKMIEVKKVNPHKEAKDMLDLMLSAAANENTSKKLSDMEVLAQSLIFLIAGYETTNITLSFVAYSLATNPDVQEKLQREIDSVWTEEDQMPSYDTVHNLPYLDMVISETLRLYPPGFVASRECTQDCVIKGYRFRKGL…
CYP3342C1	MEARLVQICSLTSLVVSHWVTIAIGVSLLLYWFGTKANRSLKKEFPNTPGPTPWPFISNLPALAKNRGQVHLLLDEFYKQYEGPAIRLSFMGKPSILVKDTALLKAIMVKNFDCFHDRLKADFSPPLDKMLTILPGEEWRNLRHALSPNFSAHKLKGMVPLMNKACDVYMKKIACAAETGETIDVMKINPALTLDIIISCAFGVESDCQNNPKDPVMKKATAAMRPSLIRTILANAVLPLLPGGQKLVSSKIGASLFFREVLELNSFVQGVIQMKKREGSSRKDMLDLMLEAAASDNTDGGKALSLDAIIANTIVFLLAGHETTSSTIAFASYFLAKNPKIQEKLQQEIDSVWSGEEEMPSYDTVHDLPYLEMVISETLRLCPPGFAVIRECTKTCIIN…
CYP3343A2	MRSKAGSSSLPGPWSLPVVGNIFLFGSSPHRNVTNLAKHYGEVFSMKLGSMEAVILNSVDVVKEALVKRASDFSGRPPLHTFLLSSNGGRNVAFTDFGKRYIQNRRALDLALQTQTQDSVAFTEKIQAEADALVCSLLNSRKEKFNPSNQIGNTAASLQFRLFFGERLRSRYLKEAQELMDHSTDFIENSAVGNMVDFMPWVKTVFKNQVRKVEETVRSLTTFIRKLHQLRMREIQEKGDESTTIADTLIKIKKNQDKYLASDEDGNSSDEDDFDNERVINLIADSFGGGYEKLGTAMKWFVAYLVAYPEAQEQLYQEIAHVKGTNPISLEDKKKLPLLEATVLEVLRRSCFLPFALPHCTVRDTTVAGFKLPKDTIVFVNLWGCCHDPKYFKDPFKFN…
CYP3343A3	MSSKAGSSSLPGPWSLPVVGNIFLFGSSPHRNVTNLAKHYGDVFSMKLGSMEAVILNSVDVVKEALVKRASDFSGRPPLHTFLLSSNGGRNVAFTDFGKRYIQNRRALDLALQTQTQDSVAFTEKIQAEADALVCSLLNSRKEKFNSANQIGNIAASLQIRLFFGERLRSRYLKEAQELMDHSTDFIENSAVGNVVDFMPWVKTVFKSQVRKVDETVRSLTTFVRKLYQLRMREIQEKGDESTTIADTLIKIKKNQDKYLASDENGNSSDEDDFDNERVINLMADSFGGGYEKLGTAMKWFVAYLVAYPEAQEQLYQEIAHVKGTNPISLEDKKKLPLLEATVLEVLRRSCFLPFALPHCTVRDTTVAGYKLPKDTIVFVNLWGCCHDPKYFKDPFKFN…
CYP3345A1	MDRLRDWVSWSSERRGKALPGPWGLPFVGSLPHIAMHAMPHLVLTDLGKTYGDVYGLSLGAWNTVVLNSLGAAREALVQNAENFSSRPPNWQTLQALGTHKYSVAFGDYNSVQTQRKKALLRMFHQALISRADILNDVVTSEVDLLNSKLAASGPDPQDPRDLIIRASFRTQFRLSFGEHVTDEVERELMEISKAGRKFQESSNLAFLTDFLPWTRLALKKPLDKFEENIRALMDFVRKIYLERRQTYENEEQESCHASAITKHLSSFMTTSHMEEGQKQVEKKEIENQVVATLAADTFGAGLENVSSSLLWAVAYIASHDELQDELRDEIMRVVGNDRVPILQDKGNMPLLQATILETFRLGSALPLTIPHYCNKSCTVKGFEVREGSLVLVNLWGIN…
CYP3347A1	MIFVDFSRGSVLADLVLHTGLQALALFFVSLLALFVFAAKIKIRTPRFLVSRLPPGPWGFPVIGAAFRLGPKSHLDFLEMSRNYGQVFSMYLGSRLVVVLNGMALQEALTGKLSRVFAGRPKLYTMERCRNGGDGLINAPYCRKWKLMRKTAITAIHKYIATQDVLESILGKVAHGLVQRLDACAETPHNVMPELKFATASVILGILFGENHDASHVESILGTSDDFRKCVGCGLAVDFMPWMENFPIPKVNRMVKLTSDMNAVLKNLYEENKTSYSGRIRNLADAVIKVSEEHSQIDDDSDPKGEMADLDVVQTIVDLVGAGFDTSSLTLYWAIAYFVKYPQVQRRIHHEIDTVIGRDRIPTLDDVKHLPYTHACLYELLRVTCLAPTAVPHSTLEEV…
CYP3348B1	MSLMATLAGSVPNLTFGNFILCTISIYVVILVKHLCEFRGMPPGPRLKYLPFVGNLFDILYEDSSLKGLKQKYGEVFSFQVGSWKVVQAGTPEAIKEILISKSADYAGRPPFYSFLVETLGGKDIAFGNYGSAWKLHRKLFSTCLRQYVSNVPLLESCVGEQAKKLLKFLEYQKEQPFDPSDILMTSIADVICGITFGKYFGSWHKDFKTFLKLTNKSFGDTELNNQLFLLDLFYFTRYFPFSAYKENQADFDTVLGIIRRVLEEGKAHYDTKQVDNLMMGLLKARSEAEHENEEEKKALLSDDYLIGSLYDMMAAGYETTAATLKWSIVYLVNYPDVQTTIQAELTKVVGPNRMPSINDRPHLPYTQAVIMETLRLGNVADQSIPHYTLCDTTLTGYR…
CYP3348B3	MSVQEVLYSLCEYVSIGNVVLLLVCMIIGNFLWSLYDFRGMPPGPRATRAPIIGNLLSFDRGAGDLRNMTNSLRKHYGGIFALQVGSWRMVFAGSPDAVREVLVKRSADYAGRPPFHSFHLETKGGKDIAVGNYGPAWRMHRKLFTTSLRYYLHNVPLLESHISRQVKKLVALFDEEKGSAFNPAVLIKQSVADVITKMTFDEAFNASHPSFDKFFKTLLYSMEDVDLNTQRVALDFFTFTKYLPFETYRKTKEMADYVFNVLKEVVDERNKTFDPSQPTTDLLTALLKARLEAEFDTIEEKQVLLADKYLLNTLTDMFIAGYATVSDTLRWLIVYLVNYPHIQEEIHNALDKVVGSDRTPSLDDRQQLSIIQATIMETLRFTADFTLPHYTLKDTSLC…
CYP3348B4	MAYLAPLSSLSQLLTLSNVFLFVLFALLVNFVWGLYEFRGMPPGPRYTRLPVIGNFLNFDYREEDVRNMTKSLYKNYGRVFALQAGSFKTVFAASPKAVKEVLVTRSGDYAGRPPFYSFLEGTLGGKDLIVSNDGPAWKLHRKLFTSALRRYLSDTPLLESRIADQTTKLLKYFKDRQHLPFDPSDQLRSCVADVICGITFGDMFNSSHPEFDRFLGDHVFLIEDAEHNAQIALLDFFPIAQYLPFKAYKITREKDEYIFGVLRMLLDQGKKTYDDTQPARDLMTAILQERLKADAENEEQKQVLLADEYLLNQLGDMFIAGYETTSTSLRWAITFLVNYPEYQEEIHQQLDQVVGPDRMPTLADRPQLAIIQATIMEVLRLGNVVPNAIPHYTLKDTW…
CYP3348B5	MAPLELLSSLSQLLTLSNVFLFVLFALLLNFVLGLYEFRGMPPGPRYTRLPVIGNFMNFDYREEDLRNMTKSLRRAYGGVFAVQAGSFRMVFVTTPKAVKEVLVTRSADYAGRPPFYSFIDSSLGGKGLALGNYGPAWRLHRKLFTSSLRQYLSDIPLFESRVAEQARKLLKYFEDQQSQPFDPADKIRQSVADVICGITFGDKFNSTHPAFDSFFRGVVSDMDDPELTAAIGLLDLFSWAQYLPFEAYKEMRKGNEKAYDVLRMLLDQGKKTYDDTQPARDLMTALLQERVKAEAENEEQKQVLLADDYLLNQLGDMFIAGYETTSTSLRWAITFLVNYPEYQEEIHQQLDQVIGPDRMPTLADRPQLAIIQATIMEVLRVGNVADMALPHYTLKDTL…
CYP3349A1	MIAGILLACFASYGIYFVAWLILRKRKGLPPGPLPLPLIGNLHLLSSKPHLDLTRLGDIYGPIYTLNMGSQLAVVLNSYDIAKEALMKRGNAFAGRPHHFVGSKFSRDGKGVGFQNYTPTLRRQQKTIMKTVKFFDTLKTGESLQEIITKEVDYLCKRLLIFGDQSFDPRHEVTFAAGNVVGRITFGERYKGGNKEFWQLMESLTIFVEGLTATSFIDAFPFLKYVPFSMVKRVEKAVKLRDDVLNDKFRDHLKNLQNSTISTTTNRDLTYALIDEANKTNCFANSQSDALTIDHVIMTMNDMIMAGSETPTMTLLWILYFLVKYPDVQVRAQEQVDDVSRNVQPLAWEGRKRLPYLEAFIAEVLRITGVMPLAIQHLAMADTALAGYHIPKGTTVIVN…
CYP3349B1	MLDTLEYILLSDDYKNPRLIFGSIGIAVLVWLTYYILSVIHEGFFSKLPPGPLPLPLIGNAHLLGDKPHLEFCRLARKYGPVYKLRLGRQLVVVINDLALIKEASRGSDFAGRAKSISGEFFSGHGKSIGFQTYSEQWRGQHKALTIAIRHCEGKQGPLEATVADEVEKLLGRLAKQADSTFDPRLDLGLLVTNVFSRVIFGRIFKKEDGEFQSLLQQTLNFSEGLAAANFLDAFPFLQVFPFPVIKKMRETASRRDEIFLSQHQLHQVTFKEGRIRDIADALIQAEKDENQNIGSRPDADLPRSLDGLKRMYTLNESIIAGIESPLTCIMWTVALLAKYPDVQAKLQKSIDDIIGRSHVLLTYQDRSKFPYVEAVIYEALRLATVLPVAIPHFTMADA…
CYP3355A1	MIIESALALFLILTIYHFFFEYKHNNLPPGPHAWPLIGNIPQIGKQLHRSLHSLSLIYGEVYRLYLGHTLVVVLTGRAIKEALALQPVEFGGRPWTVSFDLALRGERPLVFEDYGRHVKLHRKMGHRALKVYSQKKYQQVIIQEAEELCKRIADSSDRIFDVKKEFGLCIMNIICTKIFGSRYQVNNKEFLEILNIHDNLFRLTTVTGQSLVDIFPFLRNILPIYGHTKELQETHDEWQKILWRKYKQHLDSFDVSNIRDYTDALLLAKQEAGVENTTDQKYLENKYIVSAISTVFIAGSETTATSLCWAILYLIHFPKIQDQIYASVGKLNLQERQSFVEMRKMCPILEAFIAEVLRIITLLPLGVPHKTLCETILRGYTIPKGTTVLANLWSLHHNV…
CYP3355B1	MIELCVPALLISLALIYIFYSRKERLPPGPAPWPIIGNLDLLIRKEALYKTFTNLSHKYGGVFRLYLGSKPVVVLNGKAIYDSLARQPSVFAGRPTLPPSLDFGMDPDYGVLDYGPLWKFYKKLGHSAVRVHGTDRLNEAIRVEVDEVCRRLDSLDGQPVDISKEFGIATTNVICARLFGSRYDVHDPEFLRIYEIHNKISRVVMSSRSLSDVFPFLVNILPESKERRELRELLQERYTIIWRKYKEHEQTFTPGVIRDYTDLLIDAKLSEKNSHKLTENGIISTGLASQFLAGSETTASTLSWSVVYLLNDSDVQERIHNELDDVIGKGQLPQLSHKKKLPVLEAFTAETLRLSCIGPLGMPHKTTRDTFLRGHAIPKGTTVVPNLWSLHHDSTEWKD…
CYP3355B2	MLVEFAILAASLFIFYHLFLEFRGSNLPPGPRPLPLIGNLNLLSKQMHLSFTELEKTYGKVYRLYLGHKLAIVLSGDAIKEALVRQPRNFAGRPVLNPQLKSALNRGPGLTVMDYGETWKLFRKLGHSTIKVYGENRLQDVIKDEVLELCNRLESSAGKPFDITQQSGIAVTNVICTKLFGTRYQIDDPEFLRVYEIHDKLSRIGFGGNLVTNIFPSLASILPFSEKQRDLIQIGQERYEILERKYQEHVKTFDPENIRDYTDALLKAKQDAEQEDKSSKEHLQESTIIMAGLATLFIAGSETTSTTLGWAVIYLLHNPDVQERLHKEIDDVIGRDAFPQLSKRKELPVLEAFTAETLRLANLAPLAIPHKARERSTLQGFEIPEGTTVFANLWSLHHD…
Partial CYPs
Name	Sequence
CYP3662A1	MVRNRIAEGARRGRQDFVQLMLDAQEQTIEGVAKLNDDELAAQSVAFLIAGFETTGSTLSNTAYFLATHTDVQGKLIQELDEARKNRGDKTLYDLAQHTEYLDRVLSEVLRLCAPAFILLRKCEEECTINGVHFPKGVDVNIPTYTLHRDPEAWEKPEEFDPEHFSPEAKEKRHPYSYMPFGMGPRQCIGMRFAMLEIKICLMAVLEKFAFERASDTRDWEGEAVALLRPKQILLKIRKG
CYP4KZ1	NCAHFPSISEFFEQMMGWCSQFKGFFCLWLSFAKPFFLIYEPKTVEVILSSSKHITKAQFYDFLLPWLGTGMRLFICNFIFTGEKWKKRRRLLTPTFHFKILNDFVQVFDEQSQVMVSILKSQPSEKVFNIFPLIGCCALDIIGKTAMGVNINAQKNSSSEYVKGVIRMSELALSRLKRPWVHPAFLYYLTNEGREHNKILKLLHDFTNQVIADRIQERRQKRRLVAFLDMLLNAYDAGEIDVEGVREEVDTFMFEGHDTTSAAMAWTVQLLGEHPDVQIKAQAEVDEILTAESLKGLKYLECVIKETLRIFPSVPLFARSLAEDLDLVALLRPFMQVSLKTVDQPLFFWPNPMKFDPDRFLPENSEGRHPYAFVPFSAGSRNCIGQRFALLEEKVVLA…
CYP46C1	RCLGQGLATECDEKRWSLDRKTFNPVFHRQCLKDMMSAFNRSTDLFINKLLKISDGQQEIMMVPEFSKIALDVICKVAFGMDVDLVNDTTNQLPDAVINMMQGVEKSIYKPFEWLNPFAWQSIKNAHRGIDFVRETGKKVIEVRMLAMNHGEQVPNDILQNIIALQGKLMQTGPTDFERMLDHFVTFFIAGKQTTASQMAFCLLEIADNEEIRETLVDEISRVLGDRKYVEFDDLAKMHKLGNALKETLRLYPSAPGFIGCEVGDGVREGDLQFSNDMINVSSYVSGRFPEFWVNAEDFNPMRFEDDEQVARSHFTMFPFSLGPRSCIGQHFAKIEAKVVLARFLQTFKVKLAPGQTKTIAENMTYKPRDGVVCRLTRRT
CYP46F1	YLFYVHRLYSHIPSPPRDSFFFGHVPYIRRERTRGREIHEVVIEWTNKYGPIIVFWAFHNPVVFVVSPEMVKKVLVTYDLPKSTRVYEKLQFVYNQRCTGRGILTEPDPSAWHKKRTLLNPAFHRKNLMNLMSPFNVICERMIDKLSLISDGKTQVDLADELSRTTLDVIGKVAFDIDLDAIKDDNTPFPSANSSTLMGIQQQFRSPFWRINPFMYPYQQKVIKDIKFLREFGEKVILKRKAAIEKGMDMPKDVLNHLLYMCKEDVNVPMEELVDDFVTFFIAGQETTSNLLAFTVFEIGNNPDIEQRIQNEISKVLGSRQFVEYEDLGKLQYLGQTLKESLRLHPPIPGFSRFTPDAIELGGYAIPANTGIAVDVFATHRYPGVWTEPDKFNPNRFGP…
CYP46F2	YLFYVHRLYSHIPSPPRDSFFFGHVPYIRRERTRGREIHEVVIEWTNKYGPIIVFWAFHNPVVFVVSPEMVKKVLVTYDLPKSTRVYEKLQFVYNQRCTGRGILTEPDPSAWHKKRTLLNPAFHRKNLMNLMSPFNVICERMIDKLSLISDGKTQVDLADELSRTTLDVIGKVAFDIDLDAIKDDNTPFPSANSSTLMGIQQQFRSPFWRINPFMYPYQQKVIKDIKFLREFGEKVILKRKAAIEKGMDMPKDVLNHILYMCKEDVNVPMEELVDDFVTFFIAGQETTSNLLAFTVFEIGNNPDIEQRIQNEISKVLGSRQFVEYQDLGKLQYLGQTLKESLRLHPPIPGFSRFTPDAIELGGYAIPANTGIAVDVFATHRYPGVWTEPDKFNPHRFGP…
CYP46G1	RYDHLPGPARDGFFSGHMPTVRRRRTREKIIIHQIWADLASQHMPLYVFWFFHRPVVMISDANLVKEVLIKQDLHKDPFGYNHFANLFGHRLLGGSLLSEVDHDKWKHQRALLNPAFHYKNLVAALGGFNLSCDIYLKKLATLAEDNKEVSMADELVRLALDVVGKVAYDLDVNSINAPDAPIPANTRTVLEGLVQSFRKPFIRFQPSTYDFQRKCIESVEFLPKDIEHFVLSPKLTTSSTLLEAFKKVKNQKHENFLNICCNAIVLSLXGQETTSNHMAFALLGILLHPEIERRIVAEVDEVLGSRQHVTQEDLNKMKYLDQCMKEALRLHPPQPAVTRTTKKETKLGNYVIPAGTSVMCDVHVLHHHPKYWDDPEKFDPERFNDENKLKHYAYFPFS…
CYP375B1	ETYGKIFKFDVPGGFKIISVADPDTAMAILRNEPKYPKRFDIPLIDFYRETRKKIPGVFFAEGSDWHKYRSVISKRILRPKEVADYVPEFDNIGSKFLERVEYIRGKAGTDSEYEVENLDNELFKWSFESVAYMLFDKRFGTLEENVNPDVQAFIASVGGLLENFLPATLLPVFVYKVYETEAYKNFVYHFDTMYEYAEKFIGERVQELEKEGKLDGDIQDGERVDFFRFLLSSGKLTRDDLLASVIDLLFAGVDTTSNTMQWVFYTMGKHQDKQEKLYQEIISVLQPGELPSTKHIAKMPYLRAWLKETLRLYPVFPVLPRQVPEDIVIDGYHIPAHTNFNILFYYMGRDESNFKDPLQFKPERWLRDESHSTAEAMHAFASIPFGFGTRMCVGRRIA…
CYP375C1	VVSISDPDDVQMVLRSESKFPKRSLLPLIDQYRQLRQVPPGLAFAVGEEWYKHRTVLSKKMLRPPEVAAYCPTFDAITNEFLIKIHKLRGPANSPKEYEVHDLENELFRWSFENISTVLFDKRFGCLDDHVDPDAQAFIDAVGDFFSCISSLLLIPQWFHKIYETPTYKRFIQSMDTMYEYTGALVEEKKIELMKTELESSEDKPDFFRFLLSSGKLTENDLLASVIDLLFAGVDTTSNTMLWVLYMMSQNPTEQQKLHHEVSTVLKPGEPITVNTLSSLPYLKAWIKETLRMYPIIAVLPRRMEQDLILRGYHVPAGTTAFIHQGFMGRDEALFPHPNSFRPERWLRGEAPLEDRVKNTFASIPFGFGRRMCVGRRLAGQEVHVLTARIAQRYEVTYP…
CYP375D1	KVKSYKEIPGPGWKGNLSYFGKNGIEHMHLRQQKWRQNHGPIYREQFGPYKTAFVADPKLVREVFQNEGKYPQREPQIELWMDYKEKRKQAHGVFSLNGEEWLKARSVLNKKMLKPKVVHGYAPELSNVVDDFIGRVNELRSTTSDKTVPNLQNVLFKWSMESIGTVLYEKQFGAFSKSGSEESQSIITAIQNLFSVFIKMVFMPVWVTKFYETKAVKMFYQSMDTLYDFTDKCVEEKLKEINERNVDADENSEAEFLTFLVASKSLSLSEITSNLVEILMAAVDTTSNTSLWACYCLAKNPEVQEKLHKEVTSVLEPGEVATLATLNKMRYLRSVIKETLRLYPAAPENARFMQKDTEIGGYLIPQGTMVRIPLYVMGRDPEIFDDPLTFSPERWMRG…
CYP3094B2	MTELAKKYGKIYSLTLPGQQCVVLNSSELAREALLTRKDEFSGRPSTFVGDFITRSSADIICADHTQTMVRLRKIAHKALQMYGRGMQRLEALSTNLRRSKLHFFSDPASLVSKSSRLIKYACKIRDDILTRKYLEHKEKFEIENANNNFEVNDLTDALLQAFADEKRELRKAEALTEDNIMMTMNDVFNAGFETTTTAILWLIAYLSKHPDVQDKIHAELDEVIGGSRMPQLKDRHNMPYIEATIAEILRIRSIVPLALPHKATCDTTLSGYDVPKGTTVIVNLWAIHHDPEEWLNPEEFDPSRFLDADGSYRAAGEKSFLPFSAGRRSCLGEALAKMELFLVCSRILHQFRFSHLEGEAPTLESHAGVVLHPKSFRVVITERA
CYP3094E5	LPIINNLLSITGSDSHIAAAKLAKTYGDIFMLKIFNDRFVFVSSGAGAREVLMGKRMNDLAGRPQTFTFNLLSRGAKDIVLGDYSRHLVWRRKIVHLGLRMYFPKLEENIAWEVSKLEGKLMEDIGAAIHSKEVFLLLITNIISSFLLGKSYEPDDPDFLTTLEFIRKGSQVPVSGSILDKFPFLYHLPISESRFYKNVVEPRDRLLDKFFLEHKSTFSEDCIRDLTDAFLKAKLEVEREDKKAIGEVTDDHITMLMTDVYVGGLETTSTTLSWLAAYLINYPLVQTRLQTDIDDVIGSRWPVLADKPNLPYMEATIAEVLRIATVLPMGVPHKATTNNVPLMGYNIPKDTIIVMNLWAIHHDPREWPNPDKFDPDRFINEDGKFEVPGQRSYLPFSAG…
CYP3094F1	FDPHHLLSLVTLNVMSSITFGTNYTLDDPEFLRLVLMNDTFGQCFGAFNILDMFPFLLHFPIKASKMLKYLATDRYDYLMEQARKHEDAYDGNTIRDLTDGLIKSLSEAEKGGSDIHSLVTTEDLAMIIGDMVFAGSETSATTMRWMLAYLTVYPEVQARLHQQLDDVIGRDKNTIITLKDRGRLPYVEAVIAETLRVSPPTPFLLPHKATRDTTLDGYFIPKDTTVIFNIWKIQNDPAEWADPHVFNPARFLDEDGKFVNNKNLLPFGAGRRVCVGEKVATMELFLMTSRLLRHLEFKPLSDGPPPSLEGTYGVVYYPMPYKIRALERL
CYP3094F4	PPGPRPYPIIGNSPLLIGSFSSLHVKFTELAKTYGSVYTLYLNGQRSVVVCSAKAAREGLVGRKDAFSGRPYSFSLDYVSNGSKAISFTDVCPTYFLKKRIVQSSMRQYYPQVEDKVNHQLDEVLARIKALDGTAFDPHHLLSLITLNLVTSMTFGTNYTLDDPEFLLLVQMIDDSTRSIGSMSTLDMFPFLMHLPIRTSKLLKSIAKNRNEYFMKQVQRHIDSNDGKSIRDLTDGYIKGLTEAEKEDASVHEVNSIEHIATTMGEMITAGSETSATTMGWMLAYLTVYPEVQARLHRQLDDVIGRDKNTIITLKDRDRLPYVEAVIAETMRISTAVPLAIPHKATCDTTLNGFFIPKETTVILNLWGVHHNPAEWADPHVFNPARFLDKDGSXIKNEK…
CYP3339B3	LILLIVLAVIYWVGVSSFRVLKGLNIPGPTPLPYIGNLRDIQRLGGIHVAPVRLMQEYGKVFAWSVGRTPAIHGIAGLPQLKFIGKKNCRATSTRTKCFKPQLRSMWDLELXDRASVMPIVRITHATFASLKLRRIFLYNMFYCAEDLTVSKLKCVHRKSESVDILGMFCQMTLEVILSTAFGIDSEVQKNPNNTFSDKAKEIFKSPTFLRMFLMLPFASVFFKIFRFLIHNNNMKYFIDLSKEILSKRHDKTFNRKDFVDLMLSAVNPDGSRKLSDPEIIAQSVTFLLAGHETSSNALSATAYYLALNPEVQERLRLEIRMAAETNSDKSPHELANDLEYLDCVVNEVLRLHPPVHTMNRECAQACVINGITIPAGMDVTIPFYSLHHDPDAWPEPDK…
CYP3339C1	LALLAIGVYVYGTYPFWVLRRLNIPGAPPRPFSGNLGDIQKYGGQHMALLEYRKRYGKVFSFCTGKNVEVIVADPDMLKQILVKEFSSFRNRHFAFPPKGLIRLGLFASKDEDWKRVRSTLTPTFTSGKMKTMIPLVSKSCDTLIQKLGEVADTEHSINMLSWYSQMTLEIILSCAFGVDSNVQINQENEFLQKARSIFHPPAFLKWLLXPFTQFLRYFAGLFRTQMDFFMDLARGIIQARLALQGEGRKDLVELMLNAHNEENGGKLTADEVIAQSATFLLAGHETAGNALTFTTYHLVVNPEIQERLREEILAAMRREPDKPLYELIFGLEYLEAVVNESLRITPPGHVMTRECTKECTINGITIPAGMIVKYPIYTLHHDPEAWEEPEKFNPERFL…
CYP3340A1	FAPFSFLKNLGIPGPKPWPFIGNLPILFKKKHDTYAQEYLVKTYGRLCGYYRGTRASILVADPEMAQQILVKEFDKFVNRGVSEGLLPLSSHIPPTDKNLISLQDDDWRRLRHFVTPTFSAVKIKQVVPLISESCRILVEQLGQACKDGKSVDVCRTYVKFTMETIVSTAFGIDCQTQTNPNDQFLSNAQRYFGKPSPFTILAVLFPYLQPIISVMVRRLGLGRQTEIGKSVMFIVDAARQIIKHRRETGSKGVKYLHFPQGEPSGPRKKDLLEILLSAETTDDDGKRKNKLSDDEIVAQCFTFILAGFQNTSNTMAFTSYLLALNPDKQDRLIEEIDDVAATVGDNFDYDTVLGMEYLDMVVQEALRLYPPGFRLGRTCNQSCTINGQFFPKGCLVMI…
CYP3342A1	MLTVARGETWHRVRTTVSPIFSTHKMKMMLPLMNSSCDVMMTKLQQAAESGESFNMHRLSQGLTMDSILKTIFGIESEAQLNFDDPAFVAAREAVDASTFRKILQSIVGILPSPIMKLCSGVFLSNLNDLVKITEKVIEAKKKQQEPKRKDMLDMMLEAIAEGESKSKHMTEAEVVAQCLIFMLAGYEGTNSALTFVCYNLATNPDIQEKLQQEIDSVWTDDDQVPSYDMVHQLSYLDMVVSETLRMYPPAFVQTREVTRDCIIQGRRFRKGTSILMDVYSLHHDPELWPEPERFNPGRFTAEAKQSRSPYAYLPFGAGPRNCVGMRFSLMEIKLALTRILKKYSFVVTKDTQTPPTLRADAVL
CYP3342A2	IPGPNHLPFIGTLIDTIKHGGDIRLQFAEYSRTYGRVYGLYLFGSPTIVINDPDILKEVLVKEFHSFHDRPAFFPMPEPFDSMMFFAEGETWHRVRTTVSPIFSAHKMKMVLPLMNNSCDIMMSKLQQAAEKGEPFNMYRMGQSLTMDFILRIVFGIESSVQHNYDDPAFVAARSALEASTFQKIAGAVVGMMPKPIKKMFSRVFFSHTKELVEMTEKVIAAKKTQENSTRKDILDLMLEAMIDDETKKKRMTEAEIIAQCLIFMIAGYEGTNSALTFICYNLATNPDIQEKLQQEIDSVWTDADQVLSYDILNELSYLDMVVSETLRMYPPGMLTRAVTQDCVIQGRRFRKGNAILMDVYSLHHDPELWPEPERFNPERFTAEAKQSRNPCAYLPFSA…
CYP3342B1	KPALVVCDPKMLREIFVKNFDCFYDRPVXPLDSFLSIVRGERWKRIRNTLSPTFTAHNMKSMVPLINVPCDTLMKKIEKAAETGETFDIVKYQQAVTVEIILSIVFGIQSDCQMNPDDPLMARALDAMQPTPFKQLLFNVILPILPLGSYFTQSEMGAKYIFSSMYDLASFTRSVINERKELKTSRKDLLDLMLKAADPSNKSDKRLTEDEVVSQCIIFFLGGYETTSTTLALTCHNIATHPDVQLKLQQEIDSVWTDEDQMPSYDTVHKLPYLDMVISETLRMYPPGTLLTRTCMKECTIQGIRIPKGCDIFVTSYSMQRDPRNYPDPEKFDPERFSPEAKQARDPYTFLPFGHGPRDCIGKRFAFMEMKLVLSRILRRYDIKTTPETEIPPNVGVKN…
CYP3342C2	WVTLVIGVSLLLYWFGTKSKRSLQKEFPNLSGPTPWPFISNLPALARNHGQAHLLFDEFYKQYDSPAIRVSILGKPSILVKDPTLLKAIMVKNFDCFDDQANFSPPLDKMLNALSGEEWRNLRHTLSPNFSAHKLKSMVPLMNKACDVYMEKITRAAETRATIDVMKINPALTLDIIISCAFGVESDCQNNPNDPVMKKATAAMRPSLIRTILGSVILPLLPGGQKFVSSKTGASLFFRELFELTSFVQGVIEMKNREGSSRKDMLDLMFEAAASDNTEGGKTLSLDAIIANTVVFLLAGHETTSSTIAFVSYFLAKNPKIQEKLQQEIDSVWSGNEEVPSYDTVHDLPYLEMVISETLRLCPPGFVIIRECSKTCIINELRIPQGSRVVAPVYSLHRD…
CYP3348B2	GGKGIAFGNPNTAWKLHRKLFVTSMRYYVSNIPLIDARITEQASQLQEFFSEQQGKPFNPSTVLMKRVADVICGITFGKYFNSSHPEFDRFIELTNLSFGDAELNEQLSILDLFPISKYFPFSAYKRDQTGTELVLLGTIKDVLDQGKANFDASAEVTDLMNGLLKARSEAEYQNEEEKKALLSDDYLICTLYDTVSAGYETTVSTLKWAIVYLVNYPQYQQQIQQEMDKVVGRDRMPSLTDRPRLPLIQAALMETLRAGNIADEAIPHYTLKDTTLCGYRVPKDTVVLPDLEAVHLDPNCWENPLEFNPYRHLDNEGNLLTSPPNWLPFSAGRRVCTGESLAKMKLFLFLSWMLHKFTLVPENEEPPSLEGIKGFTQSPKPFKIRAIDRYSA
CYP3348B6	PRFSSLPIVGNLRSLLSDDLKLTRLFRMKKKYGQIVSLKAGCWKIVSAGSPQALKEILISKSADYAGRPPFHSFLIETLGGKGIAFGNPNTAWKLHRKLFVTSMRYYVSNIPLIVRXITEQASQLQEFFSKQQGKPFNPSTVLMKRVADVICGITFGKYFNSSHPEFDRFIELTNLSFGDAELNEQLSILDLFPISKYFPFSAYKRDQTGTELVLLGTIKDVLDQGKANFDASAEVTDLMNGLLKARSEAEYQNEEEKKALLSDDYLICTLYDTVSAGYETTVSTLKWAIVYLVNYPQYQQQIQQEMDKVVGRDRMPSLTDRPRLPLIQAALMETLRAGNIADEAIPHYTLKDTTLCGYRVPKDTVVLPDLEAVHLDPNCWENPLEFNPYRHLDNEGNL…
CYP3349A2	PGPLPLPLIGNLHLLSSKPHLDLARLGNIYGPIYTLNMGSQLAVVLNSYEIAKEALMKRGNAFAGRPHHFVGSKFSRGGKGVGFQNYTPTLRRQQKTIMKTVKYFETLKTGENLQEIITNEVDYLCDLFVSHGCQDFDPRRDMTFAAGNVVGRITFGERFTVENEEFWQLMDSLKIFVEGLTATSFIDAFPLLRYFPFSLVKRVQTAVKLRDDVLNKRFREHQDRLRGDGMVLAKSKDLTYALIEEANQKTSRTDSQSDTLILTDDHVMMTMNDTIMAGSETPTMLLLWNIYFFVKYPDVQARAFKQIDKVISPDQPITWEDRKRLPYLEAFIAEVMRIISIMPLAVPHLAMVDMVLAGYHISKGTTVIVNLWAMGHDPKVWDAPMEFRPERFLDSRGG…
CYP3350C1	MAGLATLFLAGSETTTTTLSWAIAYLLHNPGVQARLHKEIDQVIGRDVSPKLSQRKNIPVLEAFTAETQRLSNLLPLSLPHKTASDCTLLGYEIAKGTTVFTNLWSLHHDPSIWKEPDTFNLDRFLDAEGKFQAPVGGTFLPFGAGPRVCLGEVLARSELFLFLATLLQHFEFVNPPGCPLPSLEGDMGVVLHPKPFTVCVRKRRDE
CYP3355B3	PPGPRPLPLIGNLNLLSNQMHLDFAALEKTYGKIFRVYLAHKPIIVLSGDAIKEALVRQPRNFAGRPLLPITEEIVDKRWGPALFAMDYGERWRIFRKLGHSTIKVYGEDRLQEVINEEVSELCKRLEESDEKPIDITKQFGTAVTNVICTKIFGNRYDINDPEFQRLYYINDKSTRLNIGEGWLKEAFPFLKPFLPYSQQVKEIKELDQERFVIMRAKYDEHVETFDPNHIRDYTDALLKAKQEAEEEDKSSKEHFGEGPIIMAGLVTLFLAGSETTTTTLSWAIAYLLHNPGVQARLHKEIDQVIGKDVSPKLSQRKNIPVLEAFTAETQRLSNLVPLSLPHKTTSDCTLLGYEIAKGTTVFTNLWSLHHDPSIWKEPDTFNLDRFLDAKGKFQAPV…
Additional CYPs from this species
The genes listed below were not included in the phylogenetic tree
	Notes	Transcript ID
CYP20N1	Full length	NGNLLDVKKAGSLHEYLLLLHKTYGPVASFMWGTINVVSVADPTLWKELRSLFDRPPELFKLFEPLIGKKSIQYANGVHGRKLRQLFDRGFSHQAVKDYYQSFIEDCCSDWFFLCPQVAEKVANQWVIKSSDEHIPIVESMLMLAIRAIGKAGMGKRFSAEKDVQAFMNAYRTTWEEMEACLNGSLSTKGSKRDQRFQNDMEVMRKMIRETISARRNQRTSSPEPLFIDSVLDCDFIDEKEVRKEDDMISFFVGGFHTTGNMMSWCFYYLAIHPEIQEKVHQELIDVLGNDAIDPQAASELQFCRQVLDETLRCAVVAPWGARVQYDHDLQIGEYVVPKGTPIITPFGVVLQDPELYPEPQMFDPDRFSPEAMKELPSHAYEPFGFAGKRKCPGWRFSI…
CYP375F1	Full length	MSYTRRFSTAFPRGCLIRFYATLAAPQSYVKPFDALPGPSQYLTIRSSLRVLWQSRKRPLGKELLSQQFSDVGKYGRIYKRKFPTVNIVDIADPSAAREVLGIETLGPKFDSPVLEYCKAKGNAWKSSFFANGPDWDKYRESIKSQVTRPRELAEYIPTFNQISDELLERLNSLRTPKGRNYEYEVVNLEEELIKWSFETATYAMFNQRFGYMEKRGHTDAQVFISSLRGFWEALMPLTLLPPWVFKLYKSQSYWKLLHSFDTMYRCGDLFIGKKLHELKRQGNSKARDHSDLFGLLLASGELIEDDLVASVVEFLFTGVDAVSNTMLWALYMMGENPDKQYKLHHEVTSVLGPDEALSDAALKRMPYLRAWLNETLRLYPAFPTLTRKLPRDLGLLGY…
CYP443C1 (CYP74 clan)	Full length	MAKAFKNRSPVVTPVSDVEQVPGSDKQRLFHLVRLVMLGQGYFRKRMEKCRSPVFRVNMGVKGVAICDRKAIDAMFDVKVIRKEPAFGRLNYNLILLDNYVPSIFTNDTPHERQKAFLMKICQTAQEAQILPTTQRVVTQYLERWGKADANLKQDWENDVRAMLSDIFTEAFLGVSVNPTLMYNMVKGSWAKPGSKLFKTADDAARLLREFLREALQKSTKLQSLLSTAVDAGVTEEQALADILFMLKNFNAYGGVSGALIGCLARLTVTDPKYKDAMRHEVISAVDKDGVTHESLNQMNRLHWFVLENLRMCPPVPLFFGRARNDFILHSSRGSFDIKADELLVGNVYEIHRDPNVFVNPEVFMPSRFEDGVQRNKLLEYMLPGNGPIKESPTASNHQ…
CYP443D1 (CYP74 clan)	Full length	MEGEDGDMRGIPGTYGSKLYHLVKFVKLGHLFFVDQTRKYKSSVFKCNFFGTPFIALTDFKGVTALFDPNKVEKEEGFGSFRFNKDLLDGHVPSMFSNDSQHVRKKEFLIKIAKSMKMQTLMPNILDIMPEHLIKWHFREGKGMSSQEEWEDRILLLASDIMSETLLGIRLDGDAFLNWRFSVLKPTKKTCGRPSKKSQAAMDSLEHLKAAVENSPNIDEIYEAAEKFGISHEEAVLEILWMLNFNASPGTGAAMRSAAARLSLMSKEKKNEMKEEIKMHLGTVGLNLRTLKKMNKLDQFTCEVLRMHPPVALFFGVARRDFVVETKTGNYRIRRGQRLLGNCHLAQRDPEVFETPGAKCVDTFDPDRFSLNETLKPNLLCTHGRMNQKPSGMDHNCAG…
CYP3339B2	Full length	MHILDSVNVPTVYFLAGTLILLIALAVIYWVGVSSFRVLKGLNIPGPPPLPYIGNLRDIQRLGGIHVAPVRLMQEYGKVFAWSVGRTPAIVVGDPEILKHVMVKEFQNFRNRFVVFKDIRSEMRHGMFSATDDNWKRIRSTLTPTFTSGKLRQMTPKMRESCDTLMDKIGKVADTAYLVRGIKNYHFAKIGNFSKKCAIQGESVDILGMFSPMSLEIILSTAFGIDSQVQKNPNNTFSDKAKEIFKSPTFLRMFLMLPFASVLFKIFRFLIQNNNIKYFIDLSKEILSKRHDKTFNRKDFVDLMLSAVNPDGSRKLSDPEIIAQSVTFLLAGHETSSNTLSATAYYLALNPEVQERLRLEIRMAAETNSEKSPQELANDLEYLDCVVNEVLRIHPPAHT…
CYP4LT1	Partial	MAPWLEYFLWGTLSLYITLPFGLAVLAYIIASLCSMKARSNKQVKGFGGPTSHWLKGNINDITFDGHGLAFHIRCTERFKTAYRVWFGPLRSALVLCHPDTVKPVLSKNAPKERFFYKFLFPFLGDGLGLQEGAKWWNTRKLVTPAFHFDILRRYVPIFQESAKILVEKWSQACGPSGRKVELFQDISLMTLDSVLKCAFSYSSNCQTEGHDKYIKAINGIAKALLDRLLNPFYHFDWLYRLTPARSKFMKYCDLIHQKSDEVIESRRLLQKSPCNGHHKRSYRDFLDILLEAEDINGNGLNNENIRAEVNTFMFAGHDTVASGKFSVDWCLDECHRYSYFNNKFKNVLFLFFSCRDDINNMNYLSMCMKESMRLFSPVPVIGRTLDEEYVIDGKRVPE…
CYP3094F6	Partial	MIAEVILLIVTLVLLHHLFHRYTEPSNLPPGPRPYPLIGNLPLLIGSFSSLHVKFTELAKTYGSVYTLYLNGQRSVVVGSAKALHEGLVERKDAIAGRPYSFSMEYGCKGCKNVGFADFSPFLLFKRRVVHSSLRQYYPQVEDKVNHQLDKVLTEIKALDGTAFDPHYLISLVTLNVMSSITFGTNYTLDDPEFLRLVLMNDTFGQCFGAFNILDMFPFLLHFPIKASKMLKYLATDRYDYLMEQARKHEDAYDVNTIRDLTDGFIKALSEAEKDRSEIHSLIDTDHVAMTMGDMVFAGSETSATTMRWMLAYLTVYPEVQARLHQQLDDVIGRDKNTIITLKDRGRLPYVEAVIAETLRVSPPTPLLPHKATRDTTLDGYFIPKDT
CYP3094F7	Partial	MIIEVILLIVTLVLLRHLFHRYTEPSNLPPGPRPYPIIGNSPLLIGSFSSLHVKFTELAKTYGSVYTLYLNGQRSVVVCSAKAAREGLVERKDAFSGRPYSFSLDYVSNGSKAIRFTDVCPTYFLKKRIVKSSMRQYYPQVEDQVNHQLDEVLARIKALEGTAFDPHHLLSLITLNLVTSMTFGTNYTLDDPEFLLLVQLIDDSTRSIGAMSTLDMFPYL
CYP3342A6	Partial	MAALEAALSFVSANLLSIILALIVCSILYVSCIAPYSKSRIKEALGDVPGPNHLPFIGNLMDSIKHGGDLRLQFIEYTRKFGRVYGLIFFGTPTFVINDPDILKEVLVKEFHKFHDRAVSKIQKYLEAMLTVARGKTWHRVRTTVSPIFSTHKMKMMLPLMNSSCDVMMTKLQQAAESGESFNMHKLSQGLTMDSILKTVFGIESEAQLNYNDPAFVAARSAVEASTFEKILQGIVGILPKPLMDMCCGVFLSNLKDLVKITEKVIAAKKMQQDPKQKDMLDLMLEAIADDETKSKHMTEAEVVAQCLIFLIAGYEGTNTTLTFVCYTLATNPDIQEKLQQEIDSVWTDDDQVPSYDMVHQLSYLDMVVSETLRMYPPAFLQAREVTEDCVIKDMRFRK…
CYP3340A3P	Partial	YYRGTRASILVADPEMAQQILVKEFDKFVNRGVVPLSAQTAPTDKNLIALQDDDWRRLRHIVTPTFSAVKIKQVMPLISESCRILVEQLGQACKDGKSVDVCRTYVKFTMETIVSTAFGIDCQTQTNPNDQFLSNAQRYFGKPTRTYVFFMCRLGRTCNQSYTINGQFFPKGCLVMIPVYAIHRDPEVWPESEKFQPERFTAEAKQARHPYAHLPFGGGPRNCIGMRFALLEVTMALVYILRHYRLERCPKQWxxxVPLQLQGFSYQDHKTSPIHGIYLKITKP*
Total number Genes	79
Full length Genes	49
Partial Genes	30
